# Supplementary material
Source: PubMed Central journal article supplement (PMC3155193)
Supplement: mmc1.pdf [file mmc1.pdf]

**The American Journal of Human Genetics, Volume 89**

**Supplemental Data**

**GWAS Findings for Human Iris Patterns:**

**Associations with Variants in Genes that Influence**

**Normal Neuronal Pattern Development**

**Mats Larsson, David L. Duffy, Gu Zhu, Jimmy Z. Liu, Stuart Macgregor, Allan F. McRae, Margaret J. Wright, Richard A. Sturm, David A. Mackey, Grant W. Montgomery, Nicholas G. Martin, and Sarah E. Medland**

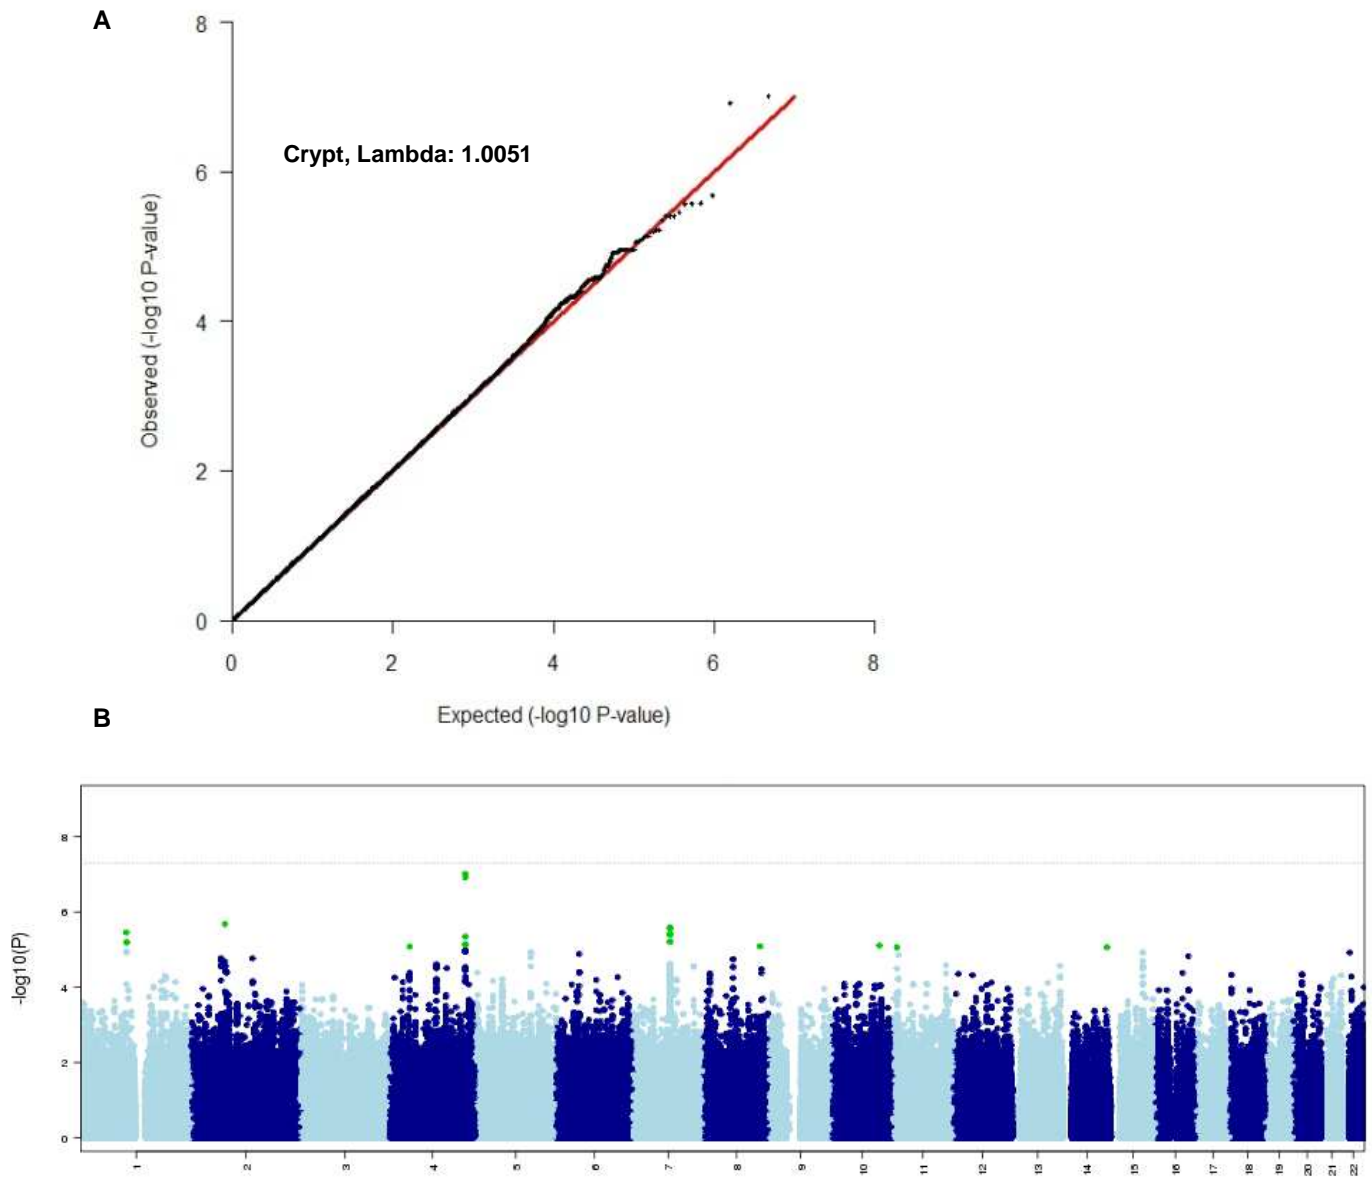

**Figure S1. Q-Q and Manhattan plots for GWAS results for crypts frequency in the discovery sample, N=2121** Areas of suggestive association ( $1.0e-5$ ) shown in green: 1p21.1 (rs10874518,  $p=3.5e-6$ ); 2p13.1 (rs205611,  $p=2.1e-6$ ); 4q32.3 (rs13140875,  $p=9.7e-8$ ), 4p12 (rs6836590,  $p=8.3e-6$ ); 7q21.11 (rs10235789,  $p=2.7e-6$ ); 8q24.13 (rs13262017,  $p=8.2e-6$ ); 10q25.1 (rs4564255,  $p=7.8e-6$ ); 11p15.4 (rs12272194,  $p=8.7e-6$ ) and 14q32.2 (rs4905757,  $p=8.6e-6$ ).

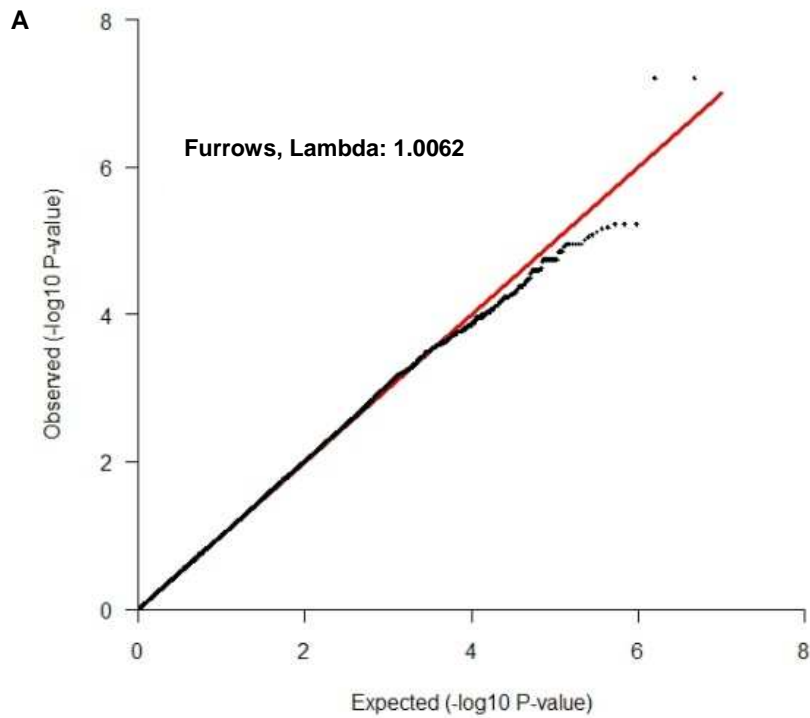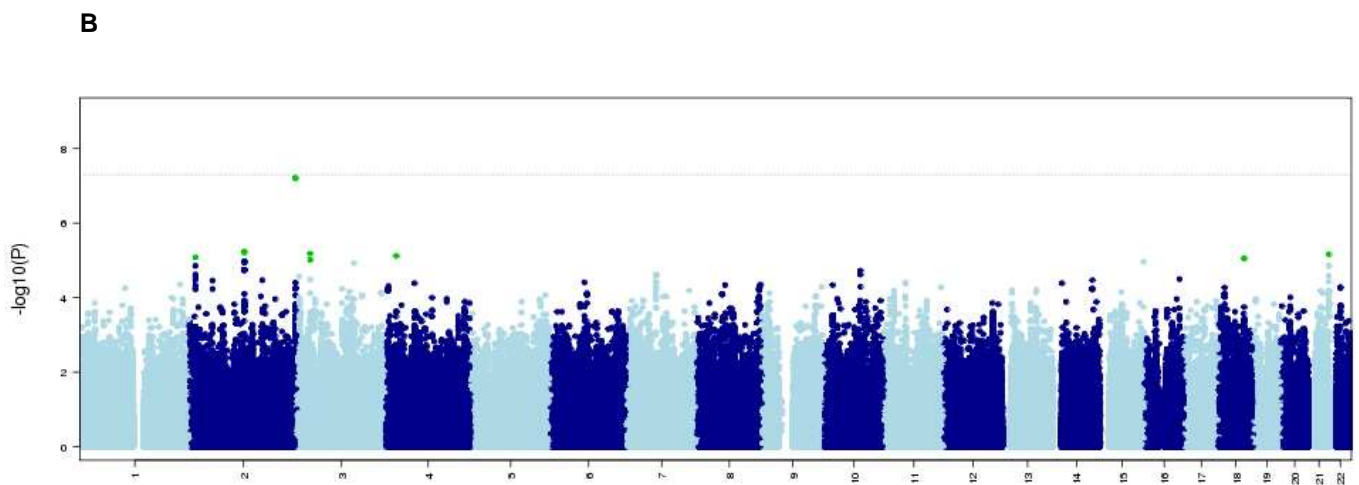

**Figure S2. Q-Q and Manhattan plots for GWAS results for furrows in the discovery sample, N=2121**

Areas of suggestive association ( $1.0 \times 10^{-5}$ ) shown in green: 2q37.3 (rs3739070,  $p=6.2 \times 10^{-8}$ ), 2q14.3 (rs17009210,  $p=6.0 \times 10^{-6}$ ), 2p24.3 (rs7568997,  $p=8.3 \times 10^{-6}$ ); 3p24.1 (rs2033702,  $p=6.6 \times 10^{-6}$ ); 4p15.2 (rs4312745,  $p=7.6 \times 10^{-6}$ ), 18q21.33 (rs10469238,  $p=8.9 \times 10^{-6}$ ) and 21q22.3 (rs13047753,  $p=6.9 \times 10^{-6}$ ).

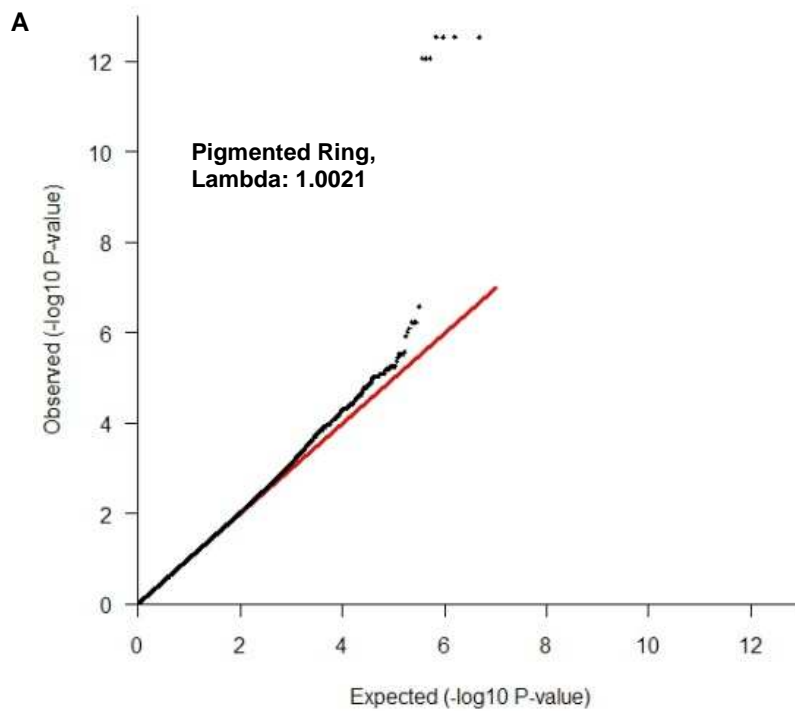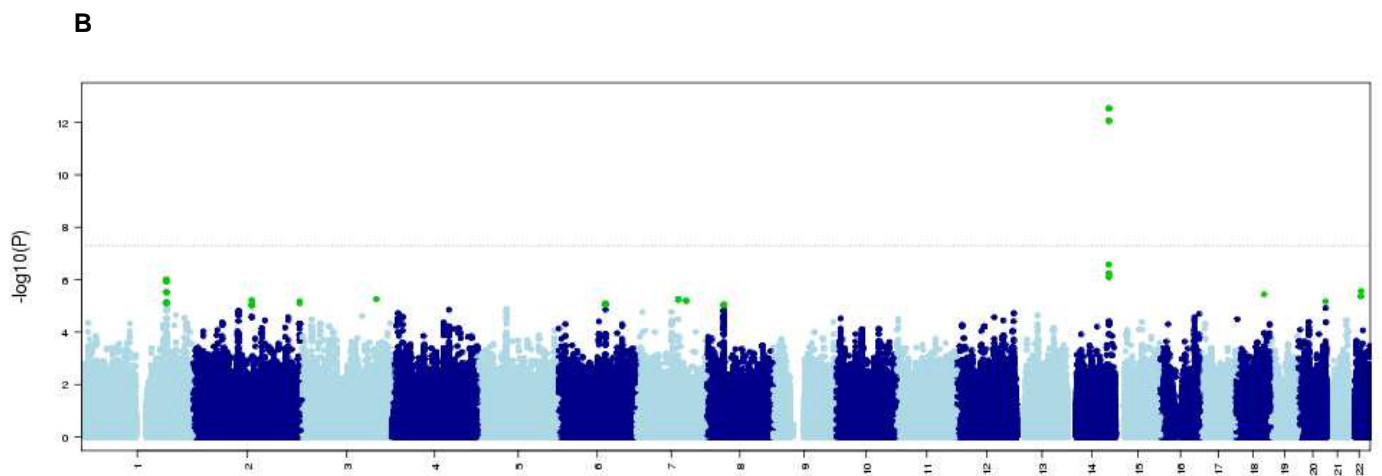

**Figure S3. Q-Q and Manhattan plots for GWAS results for pigmented ring in the discovery sample, N=2121**

Areas of suggestive association ( $1.0 \times 10^{-5}$ ) shown in green: 1q31.1 (rs2419670,  $p=1.2 \times 10^{-6}$ ); 2q21.1 (rs13400337,  $p=6.1 \times 10^{-6}$ ), 2q37.3 (rs4542797,  $p=6.7 \times 10^{-6}$ ); 3q26.1 (rs13081597,  $p=5.5 \times 10^{-6}$ ); 6q16.3 (rs9322729,  $p=8.2 \times 10^{-6}$ ); 7q21.3 (rs10808093,  $p=5.6 \times 10^{-6}$ ), 7q31.1 (rs6957003,  $p=6.4 \times 10^{-6}$ ); 8p11.23 (rs431626,  $p=8.8 \times 10^{-6}$ ); 14q32.12 (rs4900109,  $p=2.9 \times 10^{-13}$ ); 18q22.1 (rs9958293,  $p=3.6 \times 10^{-6}$ ); 20q13.33 (rs6061885,  $p=6.7 \times 10^{-6}$ ) and 22q12.2 (rs12159546,  $p=2.7 \times 10^{-6}$ ).

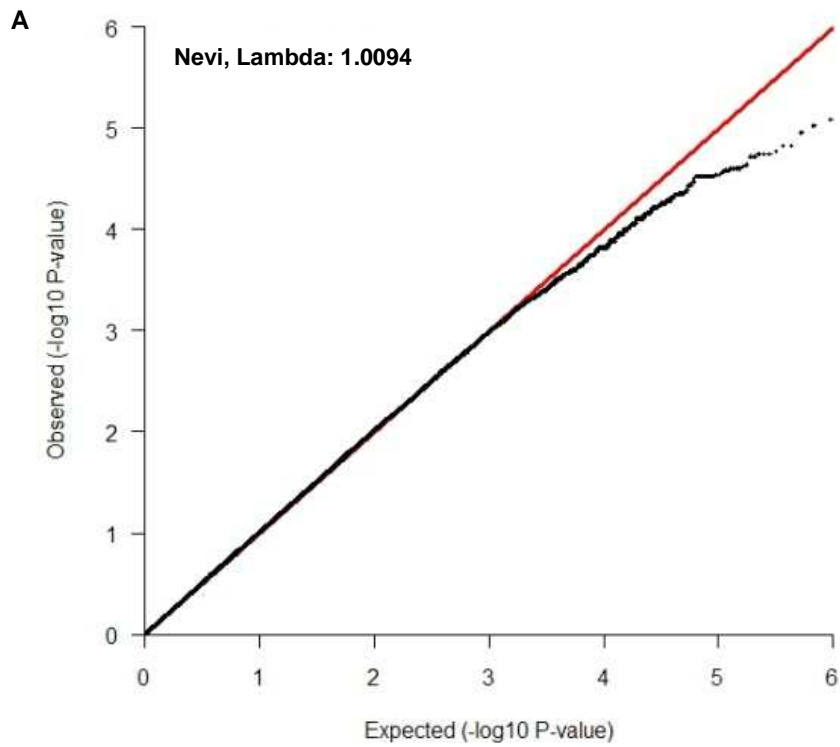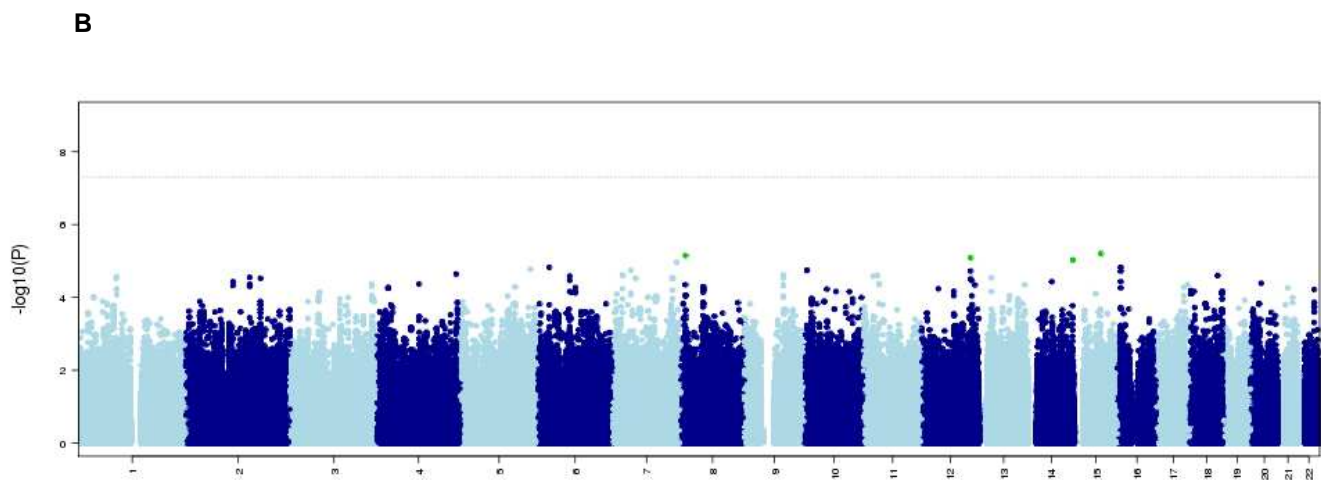

**Figure S4. Q-Q and Manhattan plots for GWAS results for frequency of iris nevi in the discovery sample, N=2121**

Areas of suggestive association ( $1.0 \times 10^{-5}$ ) shown in green: 8p23.1 (rs7822804,  $p=7.1 \times 10^{-6}$ ); 12q24.21 (rs11067162,  $p=8.2 \times 10^{-6}$ ); 14q32.33 (rs3212134,  $p=9.4 \times 10^{-6}$ ) and 15q22.31 (rs11630290,  $p=6.3 \times 10^{-6}$ ).

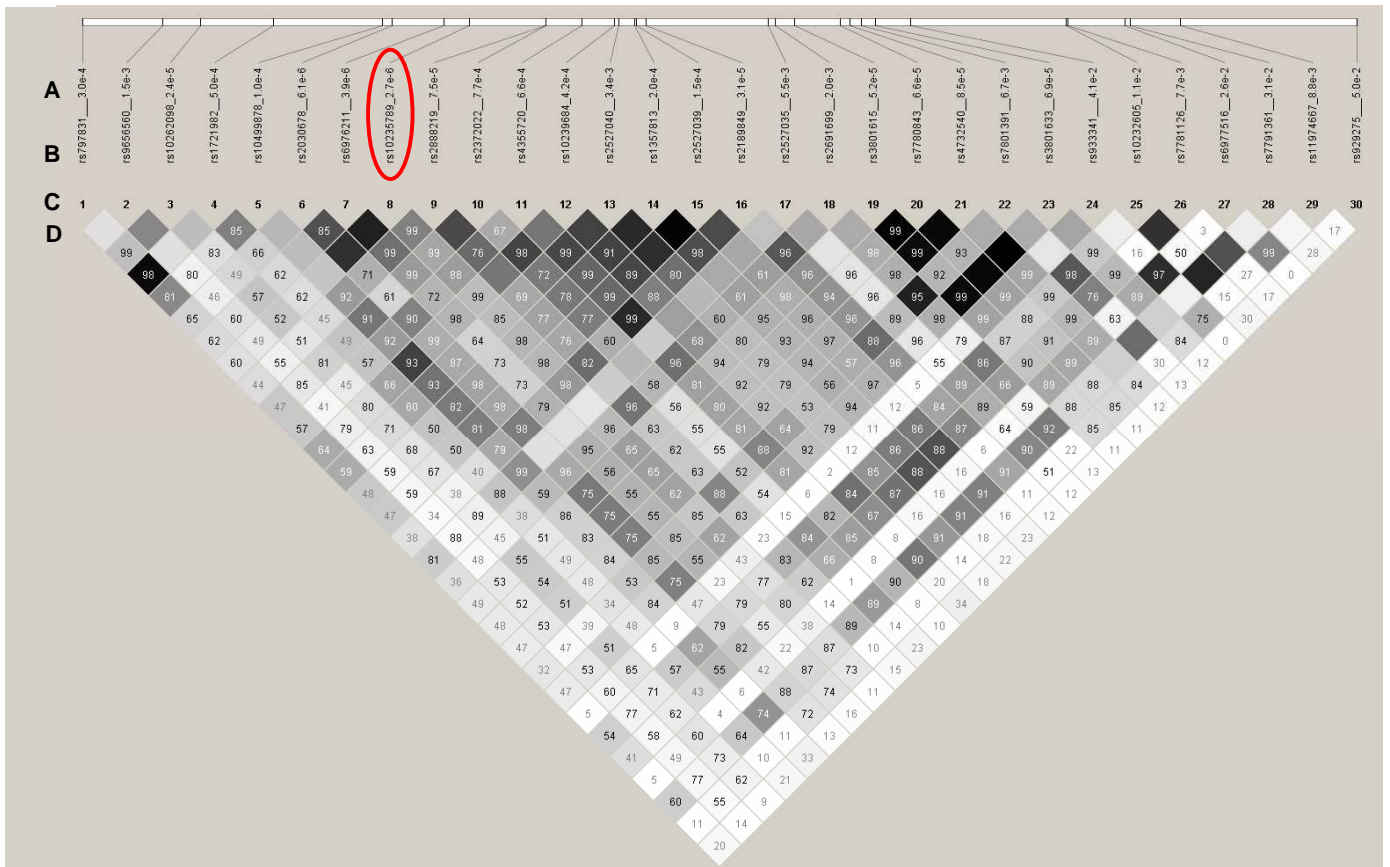

**Figure S5. LD plot for SNPs nominally associated with crypts in *SEMA3A* surrounding rs10235789**

The gene based test (VEGAS) included 379 SNPs in *SEMA3A*, 187 of these were nominally associated with crypts ( $p < .05$ ). (A) P-value for the SNPs. (B) rs-number for the SNPs. (C) SNP order in the LD plot, the most strongly associated SNP (rs10235789,  $p=2.7e-6$ ) is circled in red; (D) LD plot showing  $r^2$  between 30 SNPs in *SEMA3A* within the discovery sample ( $N = 920$ ).

**Table S1. The test-retest and inter-rater reliability of iris characteristics**

| <b>Scale</b>        | <b>Number of Categories</b> | <b>Number of raters / Observations</b> | <b>Polychoric Reliability</b> | <b>Polychoric Correlation Between Right-Left Eye</b> |
|---------------------|-----------------------------|----------------------------------------|-------------------------------|------------------------------------------------------|
| <b>Crypts</b>       | 5                           | 1/400                                  | 0.91                          | 0.91                                                 |
| <b>Furrows</b>      | 5                           | 1/400                                  | 0.94                          | 0.94                                                 |
| <b>Pigment Ring</b> | 3                           | 2/982                                  | 0.94                          | 0.95                                                 |
| <b>Iris Nevi</b>    | 4                           | 1/400                                  | 0.96                          | 0.94                                                 |

Table S2. Distribution of Iris phenotypes in the discovery and replication samples

| Sample       | Mean Age<br>(Std. Dev.) | Age<br>Range | No. of<br>Females | No. of<br>Males | Total | Percentage of Subjects % in Each Category |      |      |      |     |         |      |      |     |     |              |      |      |           |      |     |     |
|--------------|-------------------------|--------------|-------------------|-----------------|-------|-------------------------------------------|------|------|------|-----|---------|------|------|-----|-----|--------------|------|------|-----------|------|-----|-----|
|              |                         |              |                   |                 |       | Crypts                                    |      |      |      |     | Furrows |      |      |     |     | Pigment Ring |      |      | Iris Nevi |      |     |     |
|              |                         |              |                   |                 |       | 1                                         | 2    | 3    | 4    | 5   | 1       | 2    | 3    | 4   | 5   | 1            | 2    | 3    | 1         | 2    | 3   | 4   |
| <b>GWAS</b>  | 14.09 (5.36)            | 5 - 50       | 1126              | 995             | 2121  | 10.0                                      | 53.7 | 21.7 | 12.6 | 2.0 | 46.7    | 28.4 | 15.7 | 7.1 | 2.1 | 36.4         | 36.6 | 27.0 | 58.7      | 32.4 | 5.1 | 3.8 |
| <b>Rep 1</b> | 13.50 (1.96)            | 9 - 20       | 254               | 245             | 499   | 14.0                                      | 55.2 | 17.0 | 10.2 | 3.6 | 42.2    | 30.3 | 17.3 | 8.0 | 2.2 | 32.3         | 33.7 | 34.0 | 65.3      | 25.1 | 7.2 | 2.4 |
| <b>Rep 2</b> | 10.76 (4.14)            | 5 - 19       | 30                | 43              | 73    | 9.6                                       | 48.0 | 31.5 | 6.8  | 4.1 | 45.2    | 23.3 | 24.7 | 4.1 | 2.7 | 37.0         | 32.9 | 30.1 | 58.9      | 32.9 | 4.1 | 4.1 |



**Table S3. Correlations between iris characteristics in the discovery sample for males (N = 995) and females (N = 1126)**

| Scale               | Males Below Diagonal / Females Above Diagonal |         |         |            |           |        |
|---------------------|-----------------------------------------------|---------|---------|------------|-----------|--------|
|                     | Eye Color                                     | Crypt   | Furrows | Pigment R. | Iris Nevi | Age    |
| <b>Eye color</b>    |                                               | -0.14** | 0.47**  | 0.55**     | 0.21**    | 0.04   |
| <b>Crypts</b>       | -0.13**                                       |         | -0.23** | -0.13**    | 0.01      | 0.00   |
| <b>Furrows</b>      | 0.48**                                        | -0.29** |         | 0.40**     | 0.13**    | -0.04  |
| <b>Pigment Ring</b> | 0.60**                                        | -0.17** | 0.43**  |            | 0.28**    | 0.03   |
| <b>Iris Nevi</b>    | 0.26**                                        | 0.04    | 0.16**  | 0.27**     |           | 0.24** |
| <b>Age</b>          | 0.07*                                         | 0.01    | 0.07*   | 0.04       | 0.15**    |        |

\* p < .05. \*\* p < .01. The correlation between sex (females coded 1, males coded 2) and crypt and furrows, are .17\*\*, -.06\*\* respectively. The correlation between sex and the other iris characteristics where not significant, p > .05.

**Table S4. Estimated heritability of iris characteristics for the best-fitting ADE model with 95% lower and upper confidence intervals** (thresholds are corrected for age and sex).

| <b>Characteristic</b> | <b>No. of Categories</b> | <b>Additive Genetic Variance A (95% CI)</b> | <b>Non-additive Genetic Variance D (95% CI)</b> | <b>Non-shared Environmental Variance E (95% CI)</b> | <b>MZ Correlation 419 pairs</b> | <b>DZ Correlation 700 pairs</b> |
|-----------------------|--------------------------|---------------------------------------------|-------------------------------------------------|-----------------------------------------------------|---------------------------------|---------------------------------|
| <b>Crypts</b>         | 5                        | 36% (11-60%)                                | 48% (23-73%)                                    | 16% (13-20%)                                        | 0.76                            | 0.24                            |
| <b>Furrows</b>        | 5                        | 78% (52-88%)                                | 9% (0-27%)                                      | 13% (10-17%)                                        | 0.81                            | 0.35                            |
| <b>Pigment Ring</b>   | 3                        | 46% (17-72%)                                | 47% (20-75%)                                    | 7% (5-10%)                                          | 0.85                            | 0.31                            |
| <b>Iris Nevi</b>      | 4                        | 51% (17-72%)                                | 20% (0-52%)                                     | 29% (22-36%)                                        | 0.57                            | 0.25                            |

**Table S5. The 50 genes most strongly associated with crypts: VEGAS results for the discovery sample GWAS, N =2121**

| #  | Test statistics for the genes most strongly associated with Crypts |          |              |       |          | Test Statistics for the SNP most strongly associated within each gene |          |        |        |       |                |
|----|--------------------------------------------------------------------|----------|--------------|-------|----------|-----------------------------------------------------------------------|----------|--------|--------|-------|----------------|
|    | Gene                                                               | Position | #Simulations | #SNPs | P-value  | SNP                                                                   | P-value  | Allele | beta   | SE    | r <sup>2</sup> |
| 1  | <i>SEMA3A</i>                                                      | 7q21.11  | 1.00e+06     | 379   | 3.00e-06 | rs10235789                                                            | 2.70e-06 | C      | 0.098  | 0.021 | 1.27%          |
| 2  | <i>STRA6</i>                                                       | 15q24.1  | 1.00e+06     | 87    | 0.00034  | rs11858661                                                            | 0.00075  | C      | 0.080  | 0.024 | 0.65%          |
| 3  | <i>ICA1L</i>                                                       | 2q33.2   | 1.00e+06     | 59    | 0.00039  | rs12053074                                                            | 0.00043  | G      | -0.078 | 0.022 | 0.72%          |
| 4  | <i>HSPA8</i>                                                       | 11q24.1  | 1.00e+06     | 90    | 0.00046  | rs10892958                                                            | 0.00044  | C      | 0.091  | 0.026 | 0.67%          |
| 5  | <i>CCNL1</i>                                                       | 3q25.31  | 1.00e+06     | 69    | 0.00050  | rs2133952                                                             | 0.00096  | C      | 0.069  | 0.021 | 0.58%          |
| 6  | <i>C1orf173</i>                                                    | 1p31.1   | 1.00e+06     | 196   | 0.00052  | rs7541513                                                             | 0.00023  | G      | -0.077 | 0.021 | 0.77%          |
| 7  | <i>VEPH1</i>                                                       | 3q25.31  | 1.00e+06     | 364   | 0.00059  | rs1587534                                                             | 0.00096  | A      | 0.069  | 0.021 | 0.58%          |
| 8  | <i>IL1R2</i>                                                       | 2q11.2   | 1.00e+06     | 198   | 0.00065  | rs4851531                                                             | 0.00037  | C      | 0.076  | 0.021 | 0.73%          |
| 9  | <i>DISP2</i>                                                       | 15q15.1  | 1.00e+06     | 78    | 0.00070  | rs875767                                                              | 0.00023  | C      | 0.113  | 0.031 | 0.76%          |
| 10 | <i>TMEM160</i>                                                     | 19q13.32 | 1.00e+06     | 26    | 0.00072  | rs8101091                                                             | 0.00042  | G      | -0.082 | 0.023 | 0.69%          |
| 11 | <i>EPHA4</i>                                                       | 2q36.1   | 1.00e+06     | 269   | 0.00074  | rs4674596                                                             | 0.00026  | C      | -0.076 | 0.021 | 0.74%          |
| 12 | <i>TBC1D21</i>                                                     | 15q24.1  | 1.00e+06     | 90    | 0.00077  | rs1478558                                                             | 1.20e-05 | G      | 0.090  | 0.021 | 1.08%          |
| 13 | <i>TRIM29</i>                                                      | 11q23.3  | 1.00e+06     | 115   | 0.00079  | rs470411                                                              | 0.00075  | C      | 0.080  | 0.024 | 0.64%          |
| 14 | <i>CACNA1E</i>                                                     | 1q25.3   | 1.00e+06     | 392   | 0.00083  | rs3753737                                                             | 7.00e-05 | A      | -0.091 | 0.023 | 0.93%          |
| 15 | <i>CYP2D6</i>                                                      | 22q13.2  | 1.00e+06     | 54    | 0.00084  | rs742086                                                              | 0.00034  | T      | 0.083  | 0.023 | 0.73%          |
| 16 | <i>ALS2CR13</i>                                                    | 2q33.2   | 1.00e+06     | 62    | 0.00085  | rs7577225                                                             | 0.00071  | C      | -0.072 | 0.021 | 0.68%          |
| 17 | <i>BPTF</i>                                                        | 17q24.2  | 1.00e+06     | 59    | 0.00094  | rs6504550                                                             | 0.00074  | A      | -0.082 | 0.024 | 0.69%          |
| 18 | <i>NPAS1</i>                                                       | 19q13.32 | 1.00e+06     | 33    | 0.00098  | rs2303107                                                             | 0.00101  | A      | -0.074 | 0.023 | 0.59%          |
| 19 | <i>C17orf58</i>                                                    | 17q24.2  | 1.00e+06     | 14    | 0.00102  | rs9891146                                                             | 0.00102  | C      | -0.080 | 0.024 | 0.66%          |
| 20 | <i>HPX</i>                                                         | 11p15.4  | 1.00e+06     | 60    | 0.00103  | rs2723647                                                             | 0.0022   | A      | 0.077  | 0.025 | 0.54%          |
| 21 | <i>WNT7B</i>                                                       | 22q13.31 | 1.00e+06     | 1     | 0.00111  | rs6519955                                                             | 0.0011   | G      | 0.070  | 0.022 | 0.62%          |
| 22 | <i>ISLR</i>                                                        | 15q24.1  | 1.00e+06     | 65    | 0.00115  | rs11639369                                                            | 0.00117  | G      | -0.085 | 0.026 | 0.63%          |
| 23 | <i>WEE1</i>                                                        | 11p15.4  | 1.00e+06     | 66    | 0.00155  | rs12272194                                                            | 8.70e-06 | T      | -0.115 | 0.026 | 1.18%          |
| 24 | <i>GPBR</i>                                                        | 7p22.3   | 1.00e+06     | 50    | 0.00178  | rs12112166                                                            | 0.00094  | C      | -0.069 | 0.021 | 0.63%          |
| 25 | <i>C21orf2</i>                                                     | 21q22.3  | 1.00e+06     | 67    | 0.00195  | rs2236669                                                             | 4.80e-05 | T      | -0.087 | 0.021 | 0.97%          |
| 26 | <i>DNMT3A</i>                                                      | 2p23.3   | 1.00e+06     | 84    | 0.00225  | rs13420827                                                            | 0.00011  | C      | 0.104  | 0.027 | 0.86%          |
| 27 | <i>CDC25A</i>                                                      | 3p21.31  | 1.00e+06     | 34    | 0.00242  | rs10446426                                                            | 0.00021  | G      | 0.079  | 0.021 | 0.75%          |
| 28 | <i>NAGA</i>                                                        | 22q13.2  | 1.00e+06     | 43    | 0.00243  | rs2854827                                                             | 0.00049  | G      | 0.089  | 0.026 | 0.72%          |
| 29 | <i>CD248</i>                                                       | 11q13.2  | 1.00e+06     | 34    | 0.00248  | rs479018                                                              | 0.0023   | G      | -0.066 | 0.022 | 0.53%          |
| 30 | <i>BCCIP</i>                                                       | 10q26.2  | 1.00e+06     | 68    | 0.00337  | rs4385801                                                             | 0.00109  | G      | 0.069  | 0.021 | 0.63%          |
| 31 | <i>TMCO2</i>                                                       | 1p34.2   | 1.00e+06     | 40    | 0.00349  | rs12144950                                                            | 0.00048  | A      | -0.093 | 0.027 | 0.71%          |
| 32 | <i>COX6B1</i>                                                      | 19q13.12 | 1.00e+06     | 50    | 0.00404  | rs7254601                                                             | 0.00024  | A      | -0.089 | 0.024 | 0.78%          |
| 33 | <i>C7orf50</i>                                                     | 7p22.3   | 1.00e+05     | 121   | 0.00136  | rs2030958                                                             | 0.00049  | G      | 0.219  | 0.063 | 0.67%          |
| 34 | <i>LYSMD4</i>                                                      | 15q26.3  | 1.00e+05     | 92    | 0.00155  | rs8041078                                                             | 0.0022   | G      | 0.097  | 0.032 | 0.52%          |
| 35 | <i>MAP4K4</i>                                                      | 2q11.2   | 1.00e+05     | 159   | 0.00177  | rs3771903                                                             | 0.00028  | A      | -0.076 | 0.021 | 0.76%          |
| 36 | <i>OR10Z1</i>                                                      | 1q23.1   | 1.00e+05     | 88    | 0.00178  | rs12601                                                               | 0.00031  | A      | 0.075  | 0.021 | 0.73%          |
| 37 | <i>KCNS2</i>                                                       | 8q22.2   | 1.00e+05     | 66    | 0.00182  | rs17370425                                                            | 0.00029  | C      | 0.113  | 0.031 | 0.76%          |
| 38 | <i>ARMC4</i>                                                       | 10p12.1  | 1.00e+05     | 216   | 0.00186  | rs12218330                                                            | 1.00e-04 | A      | -0.121 | 0.031 | 0.82%          |
| 39 | <i>TMEM16H</i>                                                     | 19p13.11 | 1.00e+05     | 51    | 0.00188  | rs971694                                                              | 0.00027  | C      | 0.116  | 0.032 | 0.76%          |
| 40 | <i>KIAA0947</i>                                                    | 5p15.32  | 1.00e+05     | 183   | 0.00191  | rs4702271                                                             | 0.00016  | T      | -0.322 | 0.085 | 0.80%          |
| 41 | <i>C8orf34</i>                                                     | 8q13.2   | 1.00e+05     | 518   | 0.00200  | rs11989456                                                            | 0.00057  | G      | -0.083 | 0.024 | 0.66%          |
| 42 | <i>CDK6</i>                                                        | 7q21.2   | 1.00e+05     | 151   | 0.00215  | rs11974095                                                            | 0.00016  | T      | 0.154  | 0.041 | 0.80%          |
| 43 | <i>COX19</i>                                                       | 7p22.3   | 1.00e+05     | 37    | 0.00237  | rs10272099                                                            | 0.00104  | T      | 0.076  | 0.023 | 0.66%          |
| 44 | <i>C15orf52</i>                                                    | 15q15.1  | 1.00e+05     | 66    | 0.00248  | rs6492944                                                             | 0.0009   | T      | 0.099  | 0.030 | 0.62%          |
| 45 | <i>MEP1A</i>                                                       | 6p12.3   | 1.00e+05     | 156   | 0.00272  | rs1059276                                                             | 0.00013  | A      | -0.083 | 0.022 | 0.85%          |
| 46 | <i>SCN7A</i>                                                       | 2q24.3   | 1.00e+05     | 176   | 0.00274  | rs10930218                                                            | 0.00024  | T      | -0.08  | 0.022 | 0.77%          |
| 47 | <i>TPRX1</i>                                                       | 19q13.33 | 1.00e+05     | 102   | 0.00322  | rs11083901                                                            | 0.00119  | G      | 0.08   | 0.025 | 0.61%          |
| 48 | <i>WNT11</i>                                                       | 11q13.5  | 1.00e+05     | 129   | 0.00333  | rs660981                                                              | 8.10e-05 | A      | -0.082 | 0.021 | 0.87%          |
| 49 | <i>PTX3</i>                                                        | 3q25.32  | 1.00e+05     | 116   | 0.00344  | rs1456110                                                             | 0.0032   | A      | -0.06  | 0.020 | 0.48%          |
| 50 | <i>CA11</i>                                                        | 19q13.33 | 1.00e+05     | 41    | 0.00347  | rs433852                                                              | 0.0017   | C      | -0.081 | 0.026 | 0.54%          |

Shaded SNPs are also among the 50 best Krasanova<sup>55</sup> genes for crypts.

**Table S6. The 50 genes most strongly associated with furrows: VEGAS results for the discovery sample GWAS, N =2121**

| #  | Gene         | Position | Test statistics for the genes most strongly associated with Furrows |       |          | Test Statistics for the SNP most strongly associated within each gene |         |        |        |       |                |
|----|--------------|----------|---------------------------------------------------------------------|-------|----------|-----------------------------------------------------------------------|---------|--------|--------|-------|----------------|
|    |              |          | #Simulations                                                        | #SNPs | P-value  | SNP                                                                   | P-value | Allele | beta   | SE    | r <sup>2</sup> |
| 1  | FANCF        | 11p14.3  | 1.00e+06                                                            | 66    | 9.10e-05 | rs10833798                                                            | 0.00006 | A      | 0.127  | 0.032 | 0.92%          |
| 2  | HEPHL1       | 11q21    | 1.00e+06                                                            | 146   | 0.000149 | rs4753115                                                             | 0.00041 | G      | -0.086 | 0.024 | 0.71%          |
| 3  | MAPKAPK5     | 12q24.12 | 1.00e+06                                                            | 47    | 0.000402 | rs7296651                                                             | 0.00038 | C      | -0.115 | 0.032 | 0.72%          |
| 4  | TRIM62       | 1p35.1   | 1.00e+06                                                            | 64    | 0.000508 | rs3912145                                                             | 0.00014 | T      | -0.106 | 0.028 | 0.83%          |
| 5  | ALDH2        | 12q24.12 | 1.00e+06                                                            | 33    | 0.000512 | rs440                                                                 | 0.00014 | T      | -0.118 | 0.031 | 0.86%          |
| 6  | USO1         | 4q21.1   | 1.00e+06                                                            | 121   | 0.000586 | rs10028884                                                            | 0.00037 | G      | -0.129 | 0.036 | 0.71%          |
| 7  | BRAP         | 12q24.12 | 1.00e+06                                                            | 31    | 0.000732 | rs1544396                                                             | 0.00046 | T      | -0.110 | 0.031 | 0.69%          |
| 8  | HIGD1B       | 17q21.31 | 1.00e+06                                                            | 69    | 0.000912 | rs12947309                                                            | 0.00230 | C      | 0.082  | 0.027 | 0.54%          |
| 9  | PDE3B        | 11p15.2  | 1.00e+06                                                            | 136   | 0.001007 | rs6486202                                                             | 0.00023 | C      | 0.091  | 0.025 | 0.80%          |
| 10 | TMEM116      | 12q24.13 | 1.00e+06                                                            | 67    | 0.001161 | rs2339941                                                             | 0.00028 | G      | -0.115 | 0.032 | 0.77%          |
| 11 | DIRC1        | 2q32.2   | 1.00e+06                                                            | 164   | 0.001228 | rs1395864                                                             | 0.00048 | G      | 0.093  | 0.027 | 0.74%          |
| 12 | LAIR2        | 19q13.42 | 1.00e+06                                                            | 65    | 0.001281 | rs8109847                                                             | 0.00028 | T      | 0.088  | 0.024 | 0.77%          |
| 13 | GFAP         | 17q21.31 | 1.00e+06                                                            | 104   | 0.001298 | rs7225162                                                             | 0.00035 | T      | -0.087 | 0.024 | 0.74%          |
| 14 | G3BP2        | 4q21.1   | 1.00e+05                                                            | 74    | 0.00135  | rs1464071                                                             | 0.00086 | C      | -0.123 | 0.037 | 0.63%          |
| 15 | SYT6         | 1p13.2   | 1.00e+05                                                            | 214   | 0.00154  | rs2938334                                                             | 0.00026 | C      | -0.128 | 0.035 | 0.75%          |
| 16 | OR4A47       | 11p11.2  | 1.00e+05                                                            | 62    | 0.00166  | rs10838924                                                            | 0.00004 | T      | 0.183  | 0.045 | 1.13%          |
| 17 | TMCO7        | 16q22.1  | 1.00e+06                                                            | 139   | 0.001689 | rs251100                                                              | 0.00021 | C      | -0.094 | 0.025 | 0.85%          |
| 18 | ADAMTS5      | 21q21.3  | 1.00e+05                                                            | 173   | 0.00182  | rs233896                                                              | 0.00007 | T      | -0.097 | 0.024 | 0.91%          |
| 19 | CYP2R1       | 11p15.2  | 1.00e+06                                                            | 59    | 0.002114 | rs1496167                                                             | 0.00150 | A      | -0.084 | 0.027 | 0.56%          |
| 20 | COL6A1       | 21q22.3  | 1.00e+06                                                            | 94    | 0.002115 | rs13047753                                                            | 0.00001 | G      | 0.164  | 0.036 | 1.27%          |
| 21 | FAM109A      | 12q24.12 | 1.00e+05                                                            | 33    | 0.00214  | rs10774623                                                            | 0.00095 | A      | -0.095 | 0.029 | 0.62%          |
| 22 | TPRX1        | 19q13.33 | 1.00e+06                                                            | 102   | 0.002153 | rs11665715                                                            | 0.00073 | C      | -0.097 | 0.029 | 0.66%          |
| 23 | ALDH3A2      | 17p11.2  | 1.00e+05                                                            | 66    | 0.00232  | rs2386142                                                             | 0.00064 | G      | -0.085 | 0.025 | 0.70%          |
| 24 | OR10J5       | 1q23.2   | 1.00e+05                                                            | 92    | 0.00236  | rs4656837                                                             | 0.00123 | T      | 0.087  | 0.027 | 0.60%          |
| 25 | NUCB2        | 11p15.1  | 1.00e+05                                                            | 84    | 0.00269  | rs7108315                                                             | 0.00074 | C      | 0.086  | 0.026 | 0.71%          |
| 26 | GJC1         | 17q21.31 | 1.00e+05                                                            | 75    | 0.00272  | rs7223598                                                             | 0.00230 | T      | 0.082  | 0.027 | 0.54%          |
| 27 | MOBKL1B      | 2p13.1   | 1.00e+05                                                            | 77    | 0.00273  | rs1667601                                                             | 0.00023 | G      | 0.090  | 0.025 | 0.79%          |
| 28 | ZDHC21       | 9p22.3   | 1.00e+06                                                            | 275   | 0.002742 | rs2382492                                                             | 0.00014 | G      | 0.096  | 0.025 | 0.88%          |
| 29 | LOC100131897 | 5q35.1   | 1.00e+05                                                            | 304   | 0.00287  | rs30079                                                               | 0.00008 | C      | -0.093 | 0.024 | 0.86%          |
| 30 | C2orf29      | 2q11.2   | 1.00e+05                                                            | 69    | 0.00302  | rs13015194                                                            | 0.00015 | T      | -0.109 | 0.029 | 0.82%          |
| 31 | RPS13        | 11p15.1  | 1.00e+05                                                            | 31    | 0.00312  | rs17560341                                                            | 0.00050 | G      | 0.091  | 0.026 | 0.71%          |
| 32 | MEGF9        | 9q33.2   | 1.00e+05                                                            | 93    | 0.00314  | rs735110                                                              | 0.00133 | A      | -0.085 | 0.026 | 0.59%          |
| 33 | ADAD1        | 4q27     | 1.00e+05                                                            | 62    | 0.00323  | rs10027161                                                            | 0.00230 | A      | -0.135 | 0.044 | 0.53%          |
| 34 | PRMT6        | 1p13.3   | 1.00e+05                                                            | 85    | 0.00327  | rs6675948                                                             | 0.00038 | C      | -0.110 | 0.031 | 0.73%          |
| 35 | PDX1         | 13q12.2  | 1.00e+05                                                            | 70    | 0.00354  | rs4769581                                                             | 0.00033 | C      | -0.088 | 0.025 | 0.74%          |
| 36 | CEP192       | 18p11.21 | 1.00e+05                                                            | 142   | 0.00355  | rs17604778                                                            | 0.00066 | C      | 0.093  | 0.027 | 0.70%          |
| 37 | HAMP         | 19q13.12 | 1.00e+05                                                            | 71    | 0.00356  | rs928937                                                              | 0.00160 | A      | 0.080  | 0.025 | 0.59%          |
| 38 | ZNF704       | 8q21.13  | 1.00e+05                                                            | 168   | 0.00359  | rs3907424                                                             | 0.00026 | C      | 0.133  | 0.036 | 0.83%          |
| 39 | SEH1L        | 18p11.21 | 1.00e+05                                                            | 88    | 0.00361  | rs12605081                                                            | 0.00096 | G      | -0.079 | 0.024 | 0.62%          |
| 40 | HAS3         | 16q22.1  | 1.00e+06                                                            | 34    | 0.003629 | rs12325454                                                            | 0.00095 | T      | 0.109  | 0.033 | 0.63%          |
| 41 | CD200R2      | 3q13.2   | 1.00e+05                                                            | 132   | 0.0038   | rs6775807                                                             | 0.00010 | C      | -0.191 | 0.049 | 0.88%          |
| 42 | ZBTB10       | 8q21.13  | 1.00e+05                                                            | 96    | 0.00396  | rs474402                                                              | 0.00095 | G      | 0.142  | 0.043 | 0.62%          |
| 43 | TMEM45A      | 3q12.2   | 1.00e+05                                                            | 135   | 0.00397  | rs3924054                                                             | 0.00006 | G      | 0.198  | 0.049 | 0.98%          |
| 44 | MTERFD1      | 8q22.1   | 1.00e+05                                                            | 74    | 0.00431  | rs2643343                                                             | 0.00150 | C      | 0.079  | 0.025 | 0.60%          |
| 45 | SASH1        | 6q24.3   | 1.00e+05                                                            | 327   | 0.00434  | rs9399650                                                             | 0.00030 | T      | 0.093  | 0.026 | 0.74%          |
| 46 | PSMA1        | 11p15.2  | 1.00e+05                                                            | 107   | 0.00436  | rs11023238                                                            | 0.00025 | T      | -0.101 | 0.028 | 0.77%          |
| 47 | KCTD7        | 7q11.21  | 1.00e+06                                                            | 65    | 0.004417 | rs10258739                                                            | 0.00101 | T      | -0.080 | 0.024 | 0.64%          |
| 48 | FAM108C1     | 15q25.1  | 1.00e+05                                                            | 153   | 0.00442  | rs2046389                                                             | 0.00300 | T      | -0.105 | 0.035 | 0.52%          |
| 49 | SPAG9        | 17q21.33 | 1.00e+05                                                            | 98    | 0.00464  | rs1860443                                                             | 0.00021 | C      | 0.099  | 0.027 | 0.81%          |
| 50 | SEMA3A       | 7q21.11  | 1.00e+05                                                            | 379   | 0.00465  | rs10235789                                                            | 0.00009 | C      | -0.095 | 0.024 | 0.86%          |

Shaded SNPs are also among the 50 best Krasanova<sup>55</sup> genes for furrows.

**Table S7. The 50 genes most strongly associated with pigmented ring: VEGAS results for the discovery sample GWAS, N =2121**

| #  | Test statistics for the genes most strongly associated with Pigmented Ring |          |              |       |          | Test Statistics for the SNP most strongly associated within each gene |          |        |        |       |                |
|----|----------------------------------------------------------------------------|----------|--------------|-------|----------|-----------------------------------------------------------------------|----------|--------|--------|-------|----------------|
|    | Gene                                                                       | Position | #Simulations | #SNPs | P-value  | SNP                                                                   | P-value  | Allele | beta   | SE    | r <sup>2</sup> |
| 1  | <i>GPR148</i>                                                              | 2q21.1   | 1.00e+06     | 15    | 2.1e-05  | rs13400337                                                            | 6.10e-06 | C      | -0.473 | 0.104 | 1.29%          |
| 2  | <i>SLC24A4</i>                                                             | 14q32.12 | 1.00e+06     | 274   | 0.000143 | rs4900109                                                             | 2.90e-13 | G      | 0.167  | 0.023 | 3.23%          |
| 3  | <i>IL1R2</i>                                                               | 2q11.2   | 1.00e+06     | 198   | 0.000146 | rs1019031                                                             | 0.00002  | T      | -0.101 | 0.023 | 1.08%          |
| 4  | <i>ZNF30</i>                                                               | 19q13.11 | 1.00e+06     | 69    | 0.000287 | rs10422961                                                            | 0.00030  | C      | 0.087  | 0.024 | 0.79%          |
| 5  | <i>GRSF1</i>                                                               | 4q13.3   | 1.00e+06     | 56    | 0.000329 | rs1020929                                                             | 0.00043  | C      | -0.184 | 0.052 | 0.72%          |
| 6  | <i>RUFY3</i>                                                               | 4q13.3   | 1.00e+06     | 87    | 0.000428 | rs7678779                                                             | 0.00014  | C      | -0.203 | 0.053 | 0.84%          |
| 7  | <i>GNG4</i>                                                                | 1q42.3   | 1.00e+06     | 135   | 0.000449 | rs10802790                                                            | 0.00005  | G      | 0.129  | 0.032 | 0.99%          |
| 8  | <i>SLC25A40</i>                                                            | 7q21.12  | 1.00e+06     | 51    | 0.000643 | rs10225955                                                            | 0.00091  | C      | -0.248 | 0.075 | 0.78%          |
| 9  | <i>DUSP18</i>                                                              | 22q12.2  | 1.00e+06     | 91    | 0.000679 | rs12159546                                                            | 0.00000  | G      | 0.168  | 0.036 | 1.28%          |
| 10 | <i>GUCA1C</i>                                                              | 3q13.13  | 1.00e+06     | 205   | 0.000754 | rs751298                                                              | 0.00024  | T      | 0.087  | 0.024 | 0.77%          |
| 11 | <i>GLTPD1</i>                                                              | 1p36.33  | 1.00e+06     | 10    | 0.000803 | rs2296474                                                             | 0.00320  | G      | 0.266  | 0.090 | 0.45%          |
| 12 | <i>ERAL1</i>                                                               | 17q11.2  | 1.00e+06     | 34    | 0.000835 | rs2242345                                                             | 0.00040  | T      | 0.099  | 0.028 | 0.72%          |
| 13 | <i>OR10P1</i>                                                              | 12q13.2  | 1.00e+06     | 80    | 0.000869 | rs7978340                                                             | 0.00030  | G      | 0.081  | 0.022 | 0.75%          |
| 14 | <i>FLJ20309</i>                                                            | 2q33.3   | 1.00e+06     | 102   | 0.000921 | rs6718656                                                             | 0.00063  | T      | 0.075  | 0.022 | 0.66%          |
| 15 | <i>COL6A1</i>                                                              | 21q22.3  | 1.00e+06     | 94    | 0.001214 | rs13046217                                                            | 0.00009  | T      | 0.088  | 0.023 | 0.89%          |
| 16 | <i>RUNDC3B</i>                                                             | 7q21.12  | 1.00e+06     | 123   | 0.001278 | rs10216040                                                            | 0.00099  | A      | -0.244 | 0.074 | 0.76%          |
| 17 | <i>MAP4K4</i>                                                              | 2q11.2   | 1.00e+06     | 159   | 0.001335 | rs7568226                                                             | 0.00011  | A      | -0.096 | 0.025 | 0.84%          |
| 18 | <i>C4orf37</i>                                                             | 4q23     | 1.00e+06     | 494   | 0.001396 | rs12233741                                                            | 0.00060  | C      | -0.078 | 0.023 | 0.69%          |
| 19 | <i>LIPT1</i>                                                               | 2q11.2   | 1.00e+06     | 74    | 0.001666 | rs13009147                                                            | 0.00077  | G      | -0.077 | 0.023 | 0.63%          |
| 20 | <i>NDST4</i>                                                               | 4q26     | 1.00e+06     | 297   | 0.001702 | rs7673947                                                             | 0.00004  | A      | -0.150 | 0.037 | 0.94%          |
| 21 | <i>ART5</i>                                                                | 11p15.4  | 1.00e+06     | 117   | 0.001914 | rs10834648                                                            | 0.00003  | A      | 0.098  | 0.023 | 0.95%          |
| 22 | <i>CBR4</i>                                                                | 4q32.3   | 1.00e+06     | 78    | 0.001925 | rs11730894                                                            | 0.00290  | T      | 0.077  | 0.026 | 0.52%          |
| 23 | <i>MUC5AC</i>                                                              | 11p15.5  | 1.00e+06     | 70    | 0.002205 | rs10902095                                                            | 0.00030  | C      | -0.102 | 0.028 | 0.77%          |
| 24 | <i>RPL23A</i>                                                              | 17q11.2  | 1.00e+06     | 27    | 0.003348 | rs4795456                                                             | 0.00085  | G      | 0.093  | 0.028 | 0.64%          |
| 25 | <i>ZNF750</i>                                                              | 17q25.3  | 1.00e+06     | 92    | 0.003757 | rs3744159                                                             | 0.00051  | G      | -0.086 | 0.025 | 0.68%          |
| 26 | <i>LIN7B</i>                                                               | 19q13.33 | 1.00e+06     | 60    | 0.005006 | rs1009213                                                             | 0.00086  | A      | 0.078  | 0.023 | 0.62%          |
| 27 | <i>GRAMD1A</i>                                                             | 19q13.11 | 1.00e+06     | 64    | 0.006701 | rs2651080                                                             | 0.00032  | G      | 0.089  | 0.025 | 0.77%          |
| 28 | <i>ROCK1</i>                                                               | 18q11.1  | 1.00e+05     | 40    | 0.00129  | rs8085504                                                             | 0.00057  | G      | 0.183  | 0.053 | 0.64%          |
| 29 | <i>SYCP3</i>                                                               | 12q23.2  | 1.00e+05     | 85    | 0.00152  | rs10492085                                                            | 0.00015  | G      | -0.085 | 0.023 | 0.81%          |
| 30 | <i>PES1</i>                                                                | 22q12.2  | 1.00e+05     | 90    | 0.00171  | rs2301955                                                             | 0.00031  | C      | 0.080  | 0.022 | 0.73%          |
| 31 | <i>ANPEP</i>                                                               | 15q26.1  | 1.00e+05     | 95    | 0.00223  | rs16974181                                                            | 0.00062  | C      | 0.093  | 0.027 | 0.68%          |
| 32 | <i>ANXA4</i>                                                               | 2p13.3   | 1.00e+05     | 127   | 0.00254  | rs7567400                                                             | 0.00125  | G      | 0.072  | 0.022 | 0.61%          |
| 33 | <i>SLC6A12</i>                                                             | 12p13.33 | 1.00e+05     | 128   | 0.00275  | rs17692962                                                            | 0.00113  | A      | 0.075  | 0.023 | 0.61%          |
| 34 | <i>PARL</i>                                                                | 3q27.1   | 1.00e+05     | 125   | 0.00276  | rs2056332                                                             | 0.00028  | T      | -0.081 | 0.022 | 0.76%          |
| 35 | <i>IGJ</i>                                                                 | 4q13.3   | 1.00e+05     | 33    | 0.00294  | rs6813178                                                             | 0.00069  | G      | -0.168 | 0.050 | 0.67%          |
| 36 | <i>RAB39</i>                                                               | 11q22.3  | 1.00e+05     | 66    | 0.003    | rs12576453                                                            | 0.00160  | A      | 0.071  | 0.022 | 0.56%          |
| 37 | <i>TRAF4</i>                                                               | 17q11.2  | 1.00e+05     | 30    | 0.00313  | rs12453504                                                            | 0.00069  | C      | 0.094  | 0.028 | 0.66%          |
| 38 | <i>ZNF420</i>                                                              | 19q13.12 | 1.00e+05     | 75    | 0.00316  | rs11666786                                                            | 0.00240  | T      | 0.068  | 0.022 | 0.54%          |
| 39 | <i>MED15</i>                                                               | 22q11.21 | 1.00e+05     | 164   | 0.00319  | rs165591                                                              | 0.00021  | G      | -0.087 | 0.023 | 0.78%          |
| 40 | <i>MED4</i>                                                                | 13q14.2  | 1.00e+05     | 114   | 0.00327  | rs2104480                                                             | 0.00017  | G      | 0.092  | 0.024 | 0.80%          |
| 41 | <i>NPTX2</i>                                                               | 7q22.1   | 1.00e+05     | 91    | 0.00334  | rs817771                                                              | 0.00017  | A      | 0.097  | 0.026 | 0.90%          |
| 42 | <i>ANGEL2</i>                                                              | 1q32.3   | 1.00e+05     | 54    | 0.00349  | rs3002284                                                             | 0.00087  | T      | 0.080  | 0.024 | 0.65%          |
| 43 | <i>RNASEL</i>                                                              | 1q25.3   | 1.00e+05     | 95    | 0.00352  | rs11072                                                               | 0.00005  | A      | -0.099 | 0.025 | 0.96%          |
| 44 | <i>HRH3</i>                                                                | 20q13.33 | 1.00e+05     | 84    | 0.00366  | rs6062130                                                             | 0.00001  | C      | 0.116  | 0.027 | 1.16%          |
| 45 | <i>RLN3</i>                                                                | 19p13.12 | 1.00e+05     | 12    | 0.00384  | rs7249702                                                             | 0.00103  | G      | 0.092  | 0.028 | 0.67%          |
| 46 | <i>MYL3</i>                                                                | 3p21.31  | 1.00e+05     | 42    | 0.00393  | rs1077216                                                             | 0.00020  | C      | -0.159 | 0.043 | 0.76%          |
| 47 | <i>KLHL3</i>                                                               | 5q31.2   | 1.00e+05     | 134   | 0.00397  | rs757157                                                              | 0.00013  | C      | -0.086 | 0.022 | 0.85%          |
| 48 | <i>PON2</i>                                                                | 7q21.3   | 1.00e+05     | 124   | 0.00437  | rs10225097                                                            | 0.00001  | C      | 0.100  | 0.022 | 1.16%          |
| 49 | <i>GABRG3</i>                                                              | 15q12    | 1.00e+05     | 579   | 0.00444  | rs3097489                                                             | 0.00008  | C      | 0.091  | 0.023 | 0.95%          |
| 50 | <i>RAB32</i>                                                               | 6q24.3   | 1.00e+05     | 56    | 0.00457  | rs11155475                                                            | 0.00230  | G      | -0.075 | 0.025 | 0.54%          |

Shaded SNPs are also among the 50 best Krasanova<sup>55</sup> genes for pigmented ring.

**Table S8. The 50 genes most strongly associated with iris nevi: VEGAS results for the discovery sample, GWAS N =2121**

| #  | Test statistics for the genes most strongly associated with Nevi |          |              |       |         | Test Statistics for the SNP most strongly associated within each gene |         |        |        |       |                |
|----|------------------------------------------------------------------|----------|--------------|-------|---------|-----------------------------------------------------------------------|---------|--------|--------|-------|----------------|
|    | Gene                                                             | Position | #Simulations | #SNPs | P-value | SNP                                                                   | P-value | Allele | beta   | SE    | r <sup>2</sup> |
| 1  | <i>WIFI1</i>                                                     | 17q24.2  | 1.00e+06     | 96    | 0.00025 | rs1108683                                                             | 5.3e-05 | A      | 0.064  | 0.016 | 0.97%          |
| 2  | <i>JHDM1D</i>                                                    | 7q34     | 1.00e+06     | 107   | 0.00048 | rs11972958                                                            | 3.0e-05 | G      | 0.065  | 0.016 | 0.99%          |
| 3  | <i>TH</i>                                                        | 11p15.5  | 1.00e+06     | 112   | 0.00091 | rs7126629                                                             | 0.00018 | A      | 0.073  | 0.019 | 0.76%          |
| 4  | <i>PC</i>                                                        | 11q13.2  | 1.00e+06     | 50    | 0.00112 | rs11227624                                                            | 0.00108 | C      | 0.051  | 0.016 | 0.61%          |
| 5  | <i>TMEM151A</i>                                                  | 11q13.2  | 1.00e+06     | 34    | 0.00115 | rs479018                                                              | 0.00210 | G      | 0.050  | 0.016 | 0.53%          |
| 6  | <i>HADH</i>                                                      | 4q25     | 1.00e+06     | 143   | 0.00137 | rs4956145                                                             | 0.00113 | C      | -0.121 | 0.037 | 0.61%          |
| 7  | <i>CYP2U1</i>                                                    | 4q25     | 1.00e+06     | 94    | 0.00178 | rs10025485                                                            | 0.00170 | C      | -0.088 | 0.028 | 0.56%          |
| 8  | <i>GRHPR</i>                                                     | 9p13.2   | 1.00e+06     | 105   | 0.00209 | rs765566                                                              | 0.00149 | A      | 0.049  | 0.015 | 0.55%          |
| 9  | <i>NUDCD1</i>                                                    | 8q23.1   | 1.00e+06     | 124   | 0.00230 | rs2926220                                                             | 0.00160 | G      | 0.050  | 0.016 | 0.56%          |
| 10 | <i>TIAL1</i>                                                     | 10q26.11 | 1.00e+06     | 80    | 0.00268 | rs10886513                                                            | 0.00091 | T      | -0.052 | 0.016 | 0.58%          |
| 11 | <i>KRTAP5-2</i>                                                  | 11p15.5  | 1.00e+06     | 99    | 0.00270 | rs7117114                                                             | 0.00037 | T      | -0.059 | 0.016 | 0.70%          |
| 12 | <i>LRFN4</i>                                                     | 11q13.2  | 1.00e+06     | 24    | 0.00284 | rs746018                                                              | 0.00160 | C      | 0.049  | 0.016 | 0.57%          |
| 13 | <i>SLC25A40</i>                                                  | 7q21.12  | 1.00e+06     | 51    | 0.00288 | rs10263074                                                            | 0.00340 | C      | -0.150 | 0.051 | 0.58%          |
| 14 | <i>CNN2</i>                                                      | 19p13.3  | 1.00e+06     | 72    | 0.00336 | rs10408933                                                            | 0.00064 | G      | 0.091  | 0.027 | 0.71%          |
| 15 | <i>DLX2</i>                                                      | 2q31.1   | 1.00e+06     | 66    | 0.00684 | rs4972632                                                             | 0.00170 | C      | 0.071  | 0.023 | 0.57%          |
| 16 | <i>ACOT11</i>                                                    | 1p32.3   | 1.00e+05     | 165   | 0.07374 | rs12759156                                                            | 0.00270 | G      | 0.052  | 0.017 | 0.49%          |
| 17 | <i>AKR7A2</i>                                                    | 1p36.13  | 1.00e+05     | 88    | 0.02120 | rs17477654                                                            | 0.00390 | A      | -0.051 | 0.018 | 0.46%          |
| 18 | <i>ALDH9A1</i>                                                   | 1q24.1   | 1.00e+05     | 176   | 0.03136 | rs9919190                                                             | 0.00730 | C      | 0.046  | 0.017 | 0.41%          |
| 19 | <i>ALG6</i>                                                      | 1p31.3   | 1.00e+05     | 100   | 0.03907 | rs3938083                                                             | 0.00190 | C      | 0.071  | 0.023 | 0.53%          |
| 20 | <i>ALPL</i>                                                      | 1p36.12  | 1.00e+05     | 176   | 0.03578 | rs2275363                                                             | 0.00026 | C      | 0.056  | 0.015 | 0.74%          |
| 21 | <i>AMPD2</i>                                                     | 1p13.3   | 1.00e+05     | 68    | 0.07654 | rs12131828                                                            | 0.00750 | G      | -0.146 | 0.054 | 0.46%          |
| 22 | <i>AMY2A</i>                                                     | 1p21.1   | 1.00e+05     | 9     | 0.07340 | rs12136516                                                            | 0.00450 | T      | 0.060  | 0.021 | 0.49%          |
| 23 | <i>ANGEL2</i>                                                    | 1q32.3   | 1.00e+05     | 54    | 0.08161 | rs11809007                                                            | 0.00320 | G      | -0.155 | 0.053 | 0.53%          |
| 24 | <i>ANGPTL1</i>                                                   | 1q25.2   | 1.00e+05     | 52    | 0.09426 | rs1413941                                                             | 0.00970 | G      | 0.065  | 0.025 | 0.35%          |
| 25 | <i>APCS</i>                                                      | 1q23.2   | 1.00e+05     | 118   | 0.04649 | rs12029531                                                            | 0.00820 | C      | -0.041 | 0.015 | 0.38%          |
| 26 | <i>ATPAF1</i>                                                    | 1p33     | 1.00e+05     | 94    | 0.06859 | rs1150064                                                             | 0.05900 | T      | 0.033  | 0.017 | 0.20%          |
| 27 | <i>B3GALNT2</i>                                                  | 1q42.3   | 1.00e+05     | 123   | 0.05458 | rs923942                                                              | 0.00105 | G      | 0.070  | 0.021 | 0.61%          |
| 28 | <i>BARHL2</i>                                                    | 1p22.2   | 1.00e+05     | 87    | 0.10807 | rs6428601                                                             | 0.00260 | C      | 0.046  | 0.015 | 0.51%          |
| 29 | <i>BPNT1</i>                                                     | 1q41     | 1.00e+05     | 62    | 0.02687 | rs2647458                                                             | 0.00540 | A      | 0.051  | 0.018 | 0.44%          |
| 30 | <i>C1orf103</i>                                                  | 1p13.3   | 1.00e+05     | 82    | 0.06300 | rs10745314                                                            | 0.00640 | A      | 0.082  | 0.030 | 0.41%          |
| 31 | <i>C1orf116</i>                                                  | 1q32.2   | 1.00e+05     | 85    | 0.09035 | rs760418                                                              | 0.00190 | C      | 0.047  | 0.015 | 0.51%          |
| 32 | <i>C1orf157</i>                                                  | 1q32.1   | 1.00e+05     | 91    | 0.09008 | rs7525510                                                             | 0.00480 | G      | -0.043 | 0.015 | 0.44%          |
| 33 | <i>C1orf165</i>                                                  | 1p33     | 1.00e+05     | 121   | 0.08205 | rs7533353                                                             | 0.01050 | C      | -0.044 | 0.017 | 0.38%          |
| 34 | <i>C1orf201</i>                                                  | 1p36.11  | 1.00e+05     | 128   | 0.01246 | rs10903087                                                            | 0.00053 | G      | -0.056 | 0.016 | 0.69%          |
| 35 | <i>C1orf26</i>                                                   | 1q25.3   | 1.00e+05     | 76    | 0.11315 | rs12030554                                                            | 0.03500 | A      | -0.034 | 0.016 | 0.25%          |
| 36 | <i>CAMSAP1L1</i>                                                 | 1q32.1   | 1.00e+05     | 161   | 0.07502 | rs12042992                                                            | 0.00980 | C      | -0.041 | 0.016 | 0.37%          |
| 37 | <i>CAPZB</i>                                                     | 1p36.13  | 1.00e+05     | 253   | 0.02883 | rs17394154                                                            | 0.00370 | A      | -0.050 | 0.017 | 0.45%          |
| 38 | <i>CD2</i>                                                       | 1p13.1   | 1.00e+05     | 78    | 0.07464 | rs798048                                                              | 0.02900 | G      | 0.088  | 0.040 | 0.26%          |
| 39 | <i>CD48</i>                                                      | 1q23.3   | 1.00e+05     | 67    | 0.02616 | rs11265461                                                            | 0.00125 | T      | 0.051  | 0.016 | 0.58%          |
| 40 | <i>CD5L</i>                                                      | 1q23.1   | 1.00e+05     | 109   | 0.09563 | rs16839239                                                            | 0.00360 | C      | -0.066 | 0.023 | 0.49%          |
| 41 | <i>CDC42</i>                                                     | 1p36.12  | 1.00e+05     | 106   | 0.09992 | rs3820285                                                             | 0.00073 | G      | -0.171 | 0.051 | 0.56%          |
| 42 | <i>CDC7</i>                                                      | 1p22.1   | 1.00e+05     | 140   | 0.08497 | rs936340                                                              | 0.00230 | T      | -0.048 | 0.016 | 0.54%          |
| 43 | <i>CFHR3</i>                                                     | 1q31.3   | 1.00e+05     | 43    | 0.04356 | rs377298                                                              | 0.01120 | A      | 0.050  | 0.020 | 0.38%          |
| 44 | <i>CGN</i>                                                       | 1q21.3   | 1.00e+05     | 70    | 0.07205 | rs12749                                                               | 0.00430 | G      | -0.055 | 0.019 | 0.43%          |
| 45 | <i>CHML</i>                                                      | 1q43     | 1.00e+05     | 61    | 0.04338 | rs3753216                                                             | 0.00620 | A      | 0.045  | 0.016 | 0.43%          |
| 46 | <i>CLCA4</i>                                                     | 1p22.3   | 1.00e+05     | 72    | 0.06977 | rs1321681                                                             | 0.01900 | A      | -0.049 | 0.021 | 0.31%          |
| 47 | <i>CR1</i>                                                       | 1q32.2   | 1.00e+05     | 169   | 0.06600 | rs12022909                                                            | 0.00580 | T      | 0.043  | 0.016 | 0.43%          |
| 48 | <i>CRP</i>                                                       | 1q23.2   | 1.00e+05     | 97    | 0.00796 | rs10437340                                                            | 0.00042 | G      | 0.058  | 0.016 | 0.72%          |
| 49 | <i>DIRAS3</i>                                                    | 1p31.3   | 1.00e+05     | 63    | 0.01148 | rs269340                                                              | 0.00059 | C      | -0.060 | 0.017 | 0.63%          |
| 50 | <i>DMRTB1</i>                                                    | 1p32.3   | 1.00e+05     | 74    | 0.04307 | rs6588479                                                             | 0.01020 | G      | 0.040  | 0.015 | 0.36%          |

Shaded SNPs are also among the 50 best Krasanova<sup>60</sup> genes for iris nevi

**Table S9. Human orthologs of the genes identified by Krasanova (2007)**

| GeneBank# | Gene Symbols   |                | Synonyms                                 | Genes used in the polygenic score and candidate screens |
|-----------|----------------|----------------|------------------------------------------|---------------------------------------------------------|
|           | Mus musculus   | Homo sapiens   |                                          |                                                         |
| BG087256  | Abce1          | ABCE1          |                                          | ABCE1                                                   |
| BG084205  | Acsl5          | ACSL5          |                                          | ACSL5                                                   |
| BG064835  | Adamts10       | ADAMTS10       |                                          | ADAMTS10                                                |
| BG063079  | Adm            | ADM            |                                          | ADM                                                     |
| BQ551270  | Aebp1          | AEBP1          |                                          | AEBP1                                                   |
| BC047281  | Agpat4         | AGPAT4         |                                          | AGPAT4                                                  |
| BG077736  | Aldh9a1        | ALDH9A1        |                                          | ALDH9A1                                                 |
| BG069982  | Alox12         | ALOX12         |                                          | ALOX12                                                  |
| BQ551751  | Ank3           | ANK3           |                                          | ANK3                                                    |
| BQ552281  | Anxa6          | ANXA6          |                                          | ANXA6                                                   |
| BG078400  | Ap1m2          | AP1M2          |                                          | AP1M2                                                   |
| BQ552159  | Asb6           | ASB6           |                                          | ASB6                                                    |
| BG076762  | No items found | No items found | ATPase, Na+/K+ transporting beta 1       | ATP1B1                                                  |
| AU042390  | Atp2a2         | ATP2A2         |                                          | ATP2A2                                                  |
| BG078689  | Atp5a1         | ATP5A1         |                                          | ATP5A1                                                  |
| BG073437  | Atp5b          | ATP5B          |                                          | ATP5B                                                   |
| AW537398  | No items found | No items found | ATPase, H+ transporting, V1C1            | ATP6V1C1                                                |
| BG085675  | Atp6v1g1       | ATP6V1G1       |                                          | ATP6V1G1                                                |
| BQ552336  | Atp7a          | ATP7A          |                                          |                                                         |
| BG075068  | B4galt1        | B4GALT1        |                                          | B4GALT1                                                 |
| BG088471  | Bcap29         | BCAP29         |                                          | BCAP29                                                  |
| BG063556  | Bcor           | BCOR           |                                          |                                                         |
| BG071195  | Best1          | BEST1          |                                          | BEST1                                                   |
| BQ551034  | Bmp8b          | BMP8B          |                                          | BMP8B                                                   |
| BG077690  | Bzw2           | BZW2           |                                          | BZW2                                                    |
| BG072229  | Calb1          | CALB1          |                                          | CALB1                                                   |
| BC054805  | Calm1          | CALM1          |                                          | CALM1                                                   |
| BQ550528  | Ccne2          | CCNE2          |                                          | CCNE2                                                   |
| BG083664  | Ccn1           | CCNL1          |                                          | CCNL1                                                   |
| BG064770  | Cct5           | CCT5           |                                          | CCT5                                                    |
| BQ550999  | Cct6a          | CCT6A          |                                          | CCT6A                                                   |
| BG075757  | Cd81           | CD81           |                                          | CD81                                                    |
| BG072071  | Cdc42          | CDC42          |                                          | CDC42                                                   |
| BQ551224  | Cdc7           | CDC7           |                                          | CDC7                                                    |
| BG064857  | Cebpz          | CEBPZ          |                                          | CEBPZ                                                   |
| BG069861  | Cfdp1          | CFDP1          |                                          | CFDP1                                                   |
| BG066368  | Chek1          | CHEK1          |                                          | CHEK1                                                   |
| AB030378  | Chst11         | CHST11         |                                          | CHST11                                                  |
| BG067882  | Cog8           | COG8           |                                          | COG8                                                    |
| BQ552186  | Col5a1         | COL5A1         |                                          | COL5A1                                                  |
| BG075779  | Col6a1         | COL6A1         |                                          | COL6A1                                                  |
| AW554667  | Cops5          | COPS5          |                                          | COPS5                                                   |
| BG085306  | Cox6c          | COX6C          |                                          | COX6C                                                   |
| BG076988  | Cox8a          | COX8A          |                                          | COX8A                                                   |
| BQ552082  | No items found | No items found | Carboxypeptidase X 1                     | CPXM1                                                   |
| BG064928  | Dab2           | DAB2           |                                          | DAB2                                                    |
| BG087134  | Ddt            | DDT            |                                          | DDT                                                     |
| BG064782  | Ddx5           | DDX5           |                                          | DDX5                                                    |
| BG085381  | Degs1          | DEGS1          |                                          | DEGS1                                                   |
| BG088755  | Dnaja1         | DNAJA1         |                                          | DNAJA1                                                  |
| BG065483  | Dnajb1         | DNAJB1         |                                          | DNAJB1                                                  |
| BG077676  | Dnajc7         | DNAJC7         |                                          | DNAJC7                                                  |
| BG086010  | Dync1i2        | DYNC1I2        |                                          | DYNC1I2                                                 |
| AW538347  | E2f4           | E2F4           |                                          | E2F4                                                    |
| BG064751  | E4f1           | E4F1           |                                          | E4F1                                                    |
| BG084444  | Eef1e1         | EEF1E1         |                                          | EEF1E1                                                  |
| BG077018  | Eif1ax         | EIF1AX         |                                          |                                                         |
| BG077750  | Eif3a          | EIF3A          |                                          | EIF3A                                                   |
| BG064923  | Eif3i          | EIF3I          |                                          | EIF3I                                                   |
| BG078361  | Eif4g2         | EIF4G2         |                                          | EIF4G2                                                  |
| BG082125  | Elavl2         | ELAVL2         |                                          | ELAVL2                                                  |
| BG069686  | Elovl6         | ELOVL6         |                                          | ELOVL6                                                  |
| BG076147  | Emilin3        | EMILIN3        |                                          | EMILIN3                                                 |
| BG078410  | Eno1           | ENO1           |                                          | ENO1                                                    |
| BG088166  | Entpd4         | ENTPD4         |                                          | ENTPD4                                                  |
| BC034517  | Ercc2          | ERCC2          |                                          | ERCC2                                                   |
| BG077757  | Ero1l          | ERO1L          |                                          | ERO1L                                                   |
| BG087498  | Etf1           | ETFA           |                                          | ETFA                                                    |
| BG078364  | Ets1           | ETS1           |                                          | ETS1                                                    |
| BG064201  | No items found | No items found | Ewing sarcoma homolog                    | EWSR1                                                   |
| BG069346  | Eya2           | EYA2           |                                          | EYA2                                                    |
| C86521    | Fbxo32         | FBXO32         |                                          | FBXO32                                                  |
| BG064795  | No items found | No items found | Ferritin light chain 1                   | FTL                                                     |
| BG065384  | Gabarapl2      | GABARAPL2      |                                          | GABARAPL2                                               |
| BG079290  | Gata1          | GATA1          |                                          |                                                         |
| BC064681  | Gm5069         | No items found | Glyceraldehyde-3-phosphate dehydrogenase | GAPDH                                                   |
| BQ51115   | Ggps1          | GGPS1          |                                          | GGPS1                                                   |
| BG088919  | Glg1           | GLG1           |                                          | GLG1                                                    |

**Table S9. Human orthologs of the genes identified by Krasanova (2007) [continued 2]**

| GeneBank# | Gene Symbols   |                 | Synonyms                                | Genes used in the polygenic score and candidate screens |
|-----------|----------------|-----------------|-----------------------------------------|---------------------------------------------------------|
|           | Mus musculus   | Homo sapiens    |                                         |                                                         |
| BG088057  | Gmfb           | <i>GMFB</i>     |                                         | <i>GMFB</i>                                             |
| AW556794  | Gmpr2          | <i>GMPR2</i>    |                                         | <i>GMPR2</i>                                            |
| BG078399  | Gnb2l1         | <i>GNB2L1</i>   |                                         | <i>GNB2L1</i>                                           |
| BG064771  | Gnpda1         | <i>GNPDA1</i>   |                                         | <i>GNPDA1</i>                                           |
| BG065213  | No items found | No items found  | Growth factor receptor bound protein 10 | <i>GRB10</i>                                            |
| BG086478  | Gspt1          | <i>GSPT1</i>    |                                         | <i>GSPT1</i>                                            |
| BC030444  | Gstm4          | <i>GSTM4</i>    |                                         | <i>GSTM4</i>                                            |
| AU015927  | Gtf3c1         | <i>GTF3C1</i>   |                                         | <i>GTF3C1</i>                                           |
| BG064826  | Hax1           | <i>HAX1</i>     |                                         | <i>HAX1</i>                                             |
| BG085818  | Hba-a1         | No items found  | Hemoglobin alpha adult chain 1          | <i>HBA1</i>                                             |
| BG077101  | Heyl           | <i>HEYL</i>     |                                         | <i>HEYL</i>                                             |
| BG080836  | Hipk3          | <i>HIPK3</i>    |                                         | <i>HIPK3</i>                                            |
| AU020524  | Hmgcs1         | <i>HMGCS1</i>   |                                         | <i>HMGCS1</i>                                           |
| BG072533  | Hnrnpa1        | <i>HNRNPA1</i>  |                                         | <i>HNRNPA1</i>                                          |
| BG078653  | Hnrnpd         | <i>HNRNPD</i>   |                                         | <i>HNRNPD</i>                                           |
| BQ551016  | Ddx49          | <i>DDX49</i>    | Homer, neuronal immediate early gene    | <i>HOMER3</i>                                           |
| BG074109  | Hsp90aa1       | <i>HSP90AA1</i> |                                         | <i>HSP90AA1</i>                                         |
| BG087426  | Hspa8          | <i>HSPA8</i>    |                                         | <i>HSPA8</i>                                            |
| BG086000  | Igf2bp1        | <i>IGF2BP1</i>  |                                         | <i>IGF2BP1</i>                                          |
| BG063118  | Incenp         | <i>INCENP</i>   |                                         | <i>INCENP</i>                                           |
| BG066944  | Itih1          | <i>ITIH1</i>    |                                         | <i>ITIH1</i>                                            |
| BG071424  | Itm2c          | <i>ITM2C</i>    |                                         | <i>ITM2C</i>                                            |
| BG081243  | Itpr1          | <i>ITPR1</i>    |                                         | <i>ITPR1</i>                                            |
| BG080846  | Jun            | <i>JUN</i>      |                                         | <i>JUN</i>                                              |
| BG069106  | Kcnh1          | <i>KCNH1</i>    |                                         | <i>KCNH1</i>                                            |
| BG087137  | Kit            | <i>KIT</i>      |                                         | <i>KIT</i>                                              |
| BG063426  | Krt7           | <i>KRT7</i>     |                                         | <i>KRT7</i>                                             |
| BQ550072  | Lcor           | <i>LCOR</i>     |                                         | <i>LCOR</i>                                             |
| BG082595  | Ldb1           | <i>LDB1</i>     |                                         | <i>LDB1</i>                                             |
| BQ551553  | Loxl3          | <i>LOXL3</i>    |                                         | <i>LOXL3</i>                                            |
| BG064451  | Lrp10          | <i>LRP10</i>    |                                         | <i>LRP10</i>                                            |
| BG085146  | Ltf            | <i>LTF</i>      |                                         | <i>LTF</i>                                              |
| BG071774  | Lyar           | <i>LYAR</i>     |                                         | <i>LYAR</i>                                             |
| AW558740  | Man1a2         | <i>MAN1A2</i>   |                                         | <i>MAN1A2</i>                                           |
| BG064865  | Mcm5           | <i>MCM5</i>     |                                         | <i>MCM5</i>                                             |
| BQ551346  | Mcoln3         | <i>MCOLN3</i>   |                                         | <i>MCOLN3</i>                                           |
| BG064680  | Me1            | <i>ME1</i>      |                                         | <i>ME1</i>                                              |
| BG080755  | Mef2d          | <i>MEF2D</i>    |                                         | <i>MEF2D</i>                                            |
| BG065235  | Metap2         | <i>METAP2</i>   |                                         | <i>METAP2</i>                                           |
| BG073306  | Mrpl1          | <i>MRPL1</i>    |                                         | <i>MRPL1</i>                                            |
| BQ552525  | Mrpl45         | <i>MRPL45</i>   |                                         | <i>MRPL45</i>                                           |
| BG084781  | Mta3           | <i>MTA3</i>     |                                         | <i>MTA3</i>                                             |
| BG077936  | Mtf1           | <i>MTF1</i>     |                                         | <i>MTF1</i>                                             |
| BG076333  | Mthfd2         | <i>MTHFD2</i>   |                                         | <i>MTHFD2</i>                                           |
| BG072457  | Mtpn           | <i>MTPN</i>     |                                         | <i>MTPN</i>                                             |
| BG072192  | Naglu          | <i>NAGLU</i>    |                                         | <i>NAGLU</i>                                            |
| BG075327  | Ncor1          | <i>NCOR1</i>    |                                         | <i>NCOR1</i>                                            |
| BG084093  | Ndrg2          | <i>NDRG2</i>    |                                         | <i>NDRG2</i>                                            |
| BQ550897  | Ndufa10        | <i>NDUFA10</i>  |                                         | <i>NDUFA10</i>                                          |
| BC024673  | Ndufa8         | <i>NDUFA8</i>   |                                         | <i>NDUFA8</i>                                           |
| BG063606  | Ndufaf1        | <i>NDUFAF1</i>  |                                         | <i>NDUFAF1</i>                                          |
| BQ550532  | Nfkb2          | <i>NFKB2</i>    |                                         | <i>NFKB2</i>                                            |
| BG088461  | Ngfrap1        | <i>NGFRAP1</i>  |                                         |                                                         |
| BG073805  | Nisch          | <i>NISCH</i>    |                                         | <i>NISCH</i>                                            |
| BG063736  | Nik            | <i>NLK</i>      |                                         | <i>NLK</i>                                              |
| BG087125  | Nr0b2          | <i>NROB2</i>    |                                         | <i>NROB2</i>                                            |
| BG063771  | Pabpc1         | <i>PABPC1</i>   |                                         | <i>PABPC1</i>                                           |
| BQ550908  | Papola         | <i>PAPOLA</i>   |                                         | <i>PAPOLA</i>                                           |
| BQ551164  | Pask           | <i>PASK</i>     |                                         | <i>PASK</i>                                             |
| BG085359  | Pex19          | <i>PEX19</i>    |                                         | <i>PEX19</i>                                            |
| BG077408  | Pmm1           | <i>PMM1</i>     |                                         | <i>PMM1</i>                                             |
| BG071480  | Pole2          | <i>POLE2</i>    |                                         | <i>POLE2</i>                                            |
| BG074714  | Pon3           | <i>PON3</i>     |                                         | <i>PON3</i>                                             |
| BG080374  | Ppap2b         | <i>PPAP2B</i>   |                                         | <i>PPAP2B</i>                                           |
| BG071790  | Ppp1cc         | <i>PPP1CC</i>   |                                         | <i>PPP1CC</i>                                           |
| C75970    | Pp             | <i>PPP2CB</i>   |                                         | <i>PPP2CB</i>                                           |
| BQ551079  | Ppp2r2a        | <i>PPP2R2A</i>  |                                         | <i>PPP2R2A</i>                                          |
| BG064735  | Prdx6          | <i>PRDX6</i>    |                                         | <i>PRDX6</i>                                            |
| BG069165  | Preb           | <i>PREB</i>     |                                         | <i>PREB</i>                                             |
| BG084015  | Psat1          | <i>PSAT1</i>    |                                         | <i>PSAT1</i>                                            |
| BC001982  | Pasma4         | <i>PSMA4</i>    |                                         | <i>PSMA4</i>                                            |
| AU043387  | Psm12          | <i>PSMD12</i>   |                                         | <i>PSMD12</i>                                           |
| BG077865  | Psmg2          | <i>PSMG2</i>    |                                         | <i>PSMG2</i>                                            |
| BG068173  | Ptp4a1         | <i>PTP4A1</i>   |                                         | <i>PTP4A1</i>                                           |
| BG071651  | Rab11a         | <i>RAB11A</i>   |                                         | <i>RAB11A</i>                                           |
| BG080166  | Rabl3          | <i>RABL3</i>    |                                         | <i>RABL3</i>                                            |
| BG071892  | Rad21          | <i>RAD21</i>    |                                         | <i>RAD21</i>                                            |
| BQ552743  | Rbpms          | <i>RBPMS</i>    |                                         | <i>RBPMS</i>                                            |



**Table S9. Human orthologs of the genes identified by Krasanova (2007) [continued 3]**

| GeneBank# | Gene Symbols   |                      | Synonyms                                 | Genes used in the polygenic score and candidate screens |
|-----------|----------------|----------------------|------------------------------------------|---------------------------------------------------------|
|           | Mus musculus   | Homo sapiens         |                                          |                                                         |
| BG064938  | Rdbp           | <i>RDBP</i>          |                                          | <i>RDBP</i>                                             |
| BQ552179  | Rev3l          | <i>REV3L</i>         |                                          | <i>REV3L</i>                                            |
| AU041357  | Rhod           | <i>RHOD</i>          |                                          | <i>RHOD</i>                                             |
| BG086349  | Rnf11          | <i>RNF11</i>         |                                          | <i>RNF11</i>                                            |
| BG074107  | Rpl3           | <i>RPL3</i>          |                                          | <i>RPL3</i>                                             |
| BC054388  | Rpl37          | <i>RPL37</i>         | Ribosomal protein L37a                   | <i>RPL37A</i>                                           |
| BG084847  | Rpl39          | <i>RPL39</i>         |                                          |                                                         |
| BG065196  | Rpl5           | <i>RPL5</i>          |                                          | <i>RPL5</i>                                             |
| BG063883  | Rpl7           | <i>RPL7</i>          |                                          | <i>RPL7</i>                                             |
| BG077480  | No items found | No items found       | Ribosomal protein L8                     | <i>RPL8</i>                                             |
| BG072802  | Rps16          | <i>RPS16</i>         |                                          | <i>RPS16</i>                                            |
| AW556256  | Rps6           | <i>RPS6</i>          |                                          | <i>RPS6</i>                                             |
| BG063083  | Rps6ka2        | <i>RPS6KA2</i>       |                                          | <i>RPS6KA2</i>                                          |
| BG080845  | Rras2          | <i>RRAS2</i>         |                                          | <i>RRAS2</i>                                            |
| BG085334  | Sar1a          | <i>SAR1A</i>         |                                          | <i>SAR1A</i>                                            |
| BG077146  | Sars           | <i>SARS</i>          |                                          | <i>SARS</i>                                             |
| BQ551360  | Sema3a         | <i>SEMA3A</i>        |                                          | <i>SEMA3A</i>                                           |
| BG070610  | Senp3          | <i>SENP3</i>         |                                          | <i>SENP3</i>                                            |
| BG077813  | Senp6          | <i>SENP6</i>         |                                          | <i>SENP6</i>                                            |
| BG077478  | Serpinb9       | <i>SERPINB9</i>      |                                          | <i>SERPINB9</i>                                         |
| BG088179  | No items found | <i>SETDB1</i>        | SET domain, bifurcated 1                 | <i>SETDB1</i>                                           |
| BG083967  | Sfxn1          | <i>SFXN1</i>         |                                          | <i>SFXN1</i>                                            |
| BG087217  | Sfxn3          | <i>SFXN3</i>         |                                          | <i>SFXN3</i>                                            |
| BQ551075  | Sh3bp1         | <i>SH3BP1</i>        |                                          | <i>SH3BP1</i>                                           |
| BG064853  | Slc16a3        | <i>SLC16A3</i>       |                                          | <i>SLC16A3</i>                                          |
| BG085151  | Slc27a4        | <i>SLC27A4</i>       |                                          | <i>SLC27A4</i>                                          |
| BG075243  | Slc30a3        | <i>SLC30A3</i>       |                                          | <i>SLC30A3</i>                                          |
| BG064714  | Slc3a2         | <i>SLC3A2</i>        |                                          | <i>SLC3A2</i>                                           |
| BQ552559  | Slc6a6         | <i>SLC6A6</i>        |                                          | <i>SLC6A6</i>                                           |
| BG072114  | Slco2a1        | <i>SLCO2A1</i>       |                                          | <i>SLCO2A1</i>                                          |
| BG076183  | Smc1b          | <i>SMC1B</i>         |                                          | <i>SMC1B</i>                                            |
| BG085432  | Smc3           | <i>SMC3</i>          |                                          | <i>SMC3</i>                                             |
| BG077269  | Smc4           | <i>SMC4</i>          |                                          | <i>SMC4</i>                                             |
| BG070360  | Socs4          | <i>SOCS4</i>         |                                          | <i>SOCS4</i>                                            |
| BG084323  | No items found | No items found       | Solute carrier family 34                 | <i>SLC34A2</i>                                          |
| BG079034  | Sphk2          | <i>SPHK2</i>         |                                          | <i>SPHK2</i>                                            |
| BQ550910  | Srsf10         | <i>SRSF10</i>        | Neural-salient serine/arginine-rich      |                                                         |
| BQ551716  | St6galnac2     | <i>ST6GALNAC2</i>    | Sialyltransferase 7B                     | <i>ST6GALNAC2</i>                                       |
| BG077776  | Stk10          | <i>STK10</i>         |                                          | <i>STK10</i>                                            |
| BG088027  | Strn3          | <i>STRN3</i>         |                                          | <i>STRN3</i>                                            |
| BQ551727  | Unc84a / Sun1  | <i>UNC84A / SUN1</i> |                                          | <i>UNC84A</i>                                           |
| BG076926  | Syp1           | <i>SYPL1</i>         |                                          | <i>SYPL1</i>                                            |
| BG065267  | T              | <i>T</i>             |                                          | <i>T</i>                                                |
| BG075593  | Taf12          | <i>TAF12</i>         |                                          | <i>TAF12</i>                                            |
| BG085163  | Taf1a          | <i>TAF1A</i>         |                                          | <i>TAF1A</i>                                            |
| BG084568  | Tbca           | <i>TBCA</i>          |                                          | <i>TBCA</i>                                             |
| BG088173  | Tdrd1          | <i>TDRD1</i>         |                                          | <i>TDRD1</i>                                            |
| BG075056  | Tep1           | <i>TEP1</i>          |                                          | <i>TEP1</i>                                             |
| BG072137  | Tfb2m          | <i>TFB2M</i>         |                                          | <i>TFB2M</i>                                            |
| AU040433  | Tgfa           | <i>TGFA</i>          |                                          | <i>TGFA</i>                                             |
| BG086002  | Tia1           | <i>TIA1</i>          |                                          | <i>TIA1</i>                                             |
| BG069221  | Timd2          | No items found       | T-cell immunoglobulin and mucin domain 2 |                                                         |
| BG075312  | Tkt            | <i>TKT</i>           |                                          | <i>TKT</i>                                              |
| BG075073  | Tmsb4x         | <i>TMSB4X</i>        |                                          |                                                         |
| BG077775  | Tnfrsf23       | <i>TNFRSF23</i>      | TNF receptor superfamily, member 23      |                                                         |
| BG088746  | Trim27         | <i>TRIM27</i>        |                                          | <i>TRIM27</i>                                           |
| BG070343  | Trim6          | <i>TRIM6</i>         |                                          | <i>TRIM6</i>                                            |
| BG080898  | Trpm7          | <i>TRPM7</i>         |                                          | <i>TRPM7</i>                                            |
| BG076653  | Tspo / BZRAP1  | <i>TSPO / BZRAP1</i> | Benzodiazepine receptor, peripheral      | <i>BZRAP1</i>                                           |
| BG087420  | Tubb4          | <i>TUBB4</i>         |                                          | <i>TUBB4</i>                                            |
| BQ551468  | Tubd1          | <i>TUBD1</i>         |                                          | <i>TUBD1</i>                                            |
| BG077718  | Twf1           | <i>TWF1</i>          |                                          | <i>TWF1</i>                                             |
| BG065003  | Usp21          | <i>USP21</i>         |                                          | <i>USP21</i>                                            |
| BG069818  | Usp3           | <i>USP3</i>          |                                          | <i>USP3</i>                                             |
| BG076775  | Usp39          | <i>USP39</i>         |                                          | <i>USP39</i>                                            |
| BQ550549  | Vasp           | <i>VASP</i>          |                                          | <i>VASP</i>                                             |
| BG063694  | Vcl            | <i>VCL</i>           |                                          | <i>VCL</i>                                              |
| BC052677  | Wisp1          | <i>WISP1</i>         |                                          | <i>WISP1</i>                                            |
| L33417    | Vldlr          | <i>VLDLR</i>         |                                          | <i>VLDLR</i>                                            |
| BQ552129  | Wnt5b          | <i>WNT5B</i>         |                                          | <i>WNT5B</i>                                            |
| BG088199  | Xrn2           | <i>XRN2</i>          |                                          | <i>XRN2</i>                                             |
| AW539280  | Yif1a          | <i>YIF1A</i>         |                                          | <i>YIF1A</i>                                            |
| BQ551106  | Ywhab          | <i>YWHAB</i>         |                                          | <i>YWHAB</i>                                            |

For each of the 229 GeneBank transcripts reported by Krasanova et al<sup>55</sup> the gene symbols are reported for *Mus musculus* and *Homo sapiens* according to NCIB Unigene and Entrez Gene data bases. For transcripts without records in these databases the gene name, as given by Krasanova was matched to a human gene with the same name using the database GeneCards. Ten genes identified by Krasanova et al<sup>55</sup> were not included in the analyses. Seven of these are situated on the X chromosome (Atp7a, Bcor, Eif1a, Gata1, Ngrap1, Rpl39, Tmsb4x). Three others (BQ550910/Srsf13a, BG069221/Timd2, BG077775/Tnfrsf23) are currently regarded as being unique to mice.

**Table S10. The 50 genes in the Krasanova gene set most strongly associated with crypts: VEGAS results for the discovery sample GWAS, N=2121**

| #  | Test statistics for the genes most strongly associated with Crypts |          |              |       |          | Test Statistics for the SNP most strongly associated within each gene |          |        |        |       |                |
|----|--------------------------------------------------------------------|----------|--------------|-------|----------|-----------------------------------------------------------------------|----------|--------|--------|-------|----------------|
|    | Gene                                                               | Position | #Simulations | #SNPs | P-value  | SNP                                                                   | P-value  | Allele | beta   | SE    | r <sup>2</sup> |
| 1  | SEMA3A                                                             | 7q21.11  | 1.00e+06     | 379   | 3.00e-06 | rs10235789                                                            | 2.70e-06 | C      | 0.098  | 0.021 | 1.27%          |
| 2  | HSPA8                                                              | 11q24.1  | 1.00e+06     | 90    | 0.00046  | rs10892958                                                            | 0.00044  | C      | 0.091  | 0.026 | 0.67%          |
| 3  | CCNL1                                                              | 3q25.31  | 1.00e+06     | 69    | 0.00050  | rs2133952                                                             | 0.00096  | C      | 0.069  | 0.021 | 0.58%          |
| 4  | USP39                                                              | 2p11.2   | 1.00E+05     | 104   | 0.00700  | rs1254901                                                             | 0.00036  | G      | 0.082  | 0.023 | 0.77%          |
| 5  | SMC1B                                                              | 22q13.31 | 1.00E+05     | 160   | 0.01113  | rs6007032                                                             | 0.00250  | C      | 0.074  | 0.024 | 0.53%          |
| 6  | MRPL45                                                             | 17q12    | 1.00e+05     | 20    | 0.01192  | rs8066255                                                             | 0.00230  | A      | -0.092 | 0.030 | 0.55%          |
| 7  | MCOLN3                                                             | 1p22.3   | 1.00e+05     | 127   | 0.01316  | rs1975365                                                             | 0.00500  | G      | -0.061 | 0.022 | 0.45%          |
| 8  | TDRD1                                                              | 10q25.3  | 1.00e+05     | 119   | 0.01483  | rs12262953                                                            | 0.00146  | G      | 0.121  | 0.038 | 0.58%          |
| 9  | YIF1A                                                              | 11q13.2  | 1.00E+05     | 33    | 0.01602  | rs479018                                                              | 0.00230  | G      | -0.066 | 0.022 | 0.53%          |
| 10 | SPHK2                                                              | 19q13.33 | 1.00e+05     | 70    | 0.01743  | rs433852                                                              | 0.00170  | C      | -0.081 | 0.026 | 0.54%          |
| 11 | EIF3A                                                              | 10q26.11 | 1.00E+05     | 76    | 0.03007  | rs10787899                                                            | 0.00650  | A      | 0.057  | 0.021 | 0.43%          |
| 12 | PASK                                                               | 2q37.3   | 1.00e+05     | 134   | 0.03155  | rs12987697                                                            | 0.00037  | A      | 0.076  | 0.021 | 0.72%          |
| 13 | WISP1                                                              | 8q24.22  | 1.00E+05     | 206   | 0.03178  | rs753722                                                              | 0.00190  | G      | -0.070 | 0.023 | 0.54%          |
| 14 | VLDLR                                                              | 9p24.2   | 1.00e+05     | 217   | 0.04526  | rs1567712                                                             | 0.00112  | A      | 0.081  | 0.025 | 0.62%          |
| 15 | HNRNPA1                                                            | 12q13.13 | 1.00E+05     | 24    | 0.04917  | rs10506328                                                            | 0.00230  | C      | -0.067 | 0.022 | 0.54%          |
| 16 | GRB10                                                              | 7p12.1   | 1.00e+05     | 406   | 0.05621  | rs2715119                                                             | 0.00480  | T      | 0.076  | 0.027 | 0.44%          |
| 17 | COL6A1                                                             | 21q22.3  | 1.00e+05     | 94    | 0.05761  | rs13052792                                                            | 0.00094  | G      | -0.131 | 0.040 | 0.64%          |
| 18 | METAP2                                                             | 12q22    | 1.00e+05     | 118   | 0.05769  | rs10431429                                                            | 0.00600  | G      | -0.059 | 0.021 | 0.45%          |
| 19 | COX6C                                                              | 8q22.2   | 1.00e+05     | 46    | 0.05990  | rs12544943                                                            | 0.02600  | A      | -0.071 | 0.032 | 0.30%          |
| 20 | MEF2D                                                              | 1q22     | 1.00e+05     | 83    | 0.06942  | rs7548323                                                             | 0.00200  | G      | -0.088 | 0.028 | 0.55%          |
| 21 | RBPMS                                                              | 8p12     | 1.00e+05     | 193   | 0.07294  | rs6468319                                                             | 0.01500  | C      | 0.058  | 0.024 | 0.34%          |
| 22 | EYA2                                                               | 20q13.12 | 1.00E+05     | 475   | 0.07382  | rs2868860                                                             | 0.00059  | T      | 0.107  | 0.031 | 0.74%          |
| 23 | CPXM1                                                              | 20p13    | 1.00E+05     | 72    | 0.08154  | rs6037407                                                             | 0.00880  | A      | -0.133 | 0.051 | 0.41%          |
| 24 | MTPN                                                               | 7q33     | 1.00E+05     | 122   | 0.09171  | rs894793                                                              | 0.00350  | T      | 0.060  | 0.021 | 0.47%          |
| 25 | SERPINB9                                                           | 6p25.2   | 1.00E+05     | 118   | 0.09251  | rs380779                                                              | 0.00760  | T      | -0.060 | 0.022 | 0.40%          |
| 26 | DNAJB1                                                             | 19p13.12 | 1.00E+05     | 49    | 0.10006  | rs10409467                                                            | 0.00900  | C      | 0.295  | 0.113 | 0.43%          |
| 27 | RPS6                                                               | 9p22.1   | 1000         | 75    | 0.10300  | rs2277151                                                             | 0.01300  | A      | 0.072  | 0.029 | 0.36%          |
| 28 | TRIM27                                                             | 6p22.1   | 1000         | 112   | 0.11400  | rs2038887                                                             | 0.01110  | T      | -0.117 | 0.046 | 0.37%          |
| 29 | ANK3                                                               | 10q21.2  | 1000         | 547   | 0.11800  | rs10821762                                                            | 0.00135  | G      | -0.067 | 0.021 | 0.57%          |
| 30 | SENP3                                                              | 17p13.1  | 1000         | 47    | 0.12200  | rs11078697                                                            | 0.00810  | C      | 0.273  | 0.103 | 0.46%          |
| 31 | GAPDH                                                              | 12p13.31 | 1000         | 74    | 0.12500  | rs4764602                                                             | 0.01900  | A      | -0.049 | 0.021 | 0.32%          |
| 32 | LCOR                                                               | 10q24.1  | 1000         | 80    | 0.12700  | rs10399993                                                            | 0.02600  | T      | -0.058 | 0.026 | 0.29%          |
| 33 | RPS6KA2                                                            | 6q27     | 1000         | 761   | 0.13300  | rs10946173                                                            | 0.00280  | C      | 0.064  | 0.021 | 0.51%          |
| 34 | EMILIN3                                                            | 20q12    | 1000         | 75    | 0.14400  | rs7275102                                                             | 0.00880  | A      | 0.060  | 0.023 | 0.38%          |
| 35 | GMPT2                                                              | 14q12    | 1000         | 53    | 0.14500  | rs2256989                                                             | 0.02200  | T      | -0.051 | 0.022 | 0.31%          |
| 36 | ST6GALNAC2                                                         | 17q25.1  | 1000         | 74    | 0.14700  | rs895157                                                              | 0.00850  | A      | 0.068  | 0.026 | 0.40%          |
| 37 | GNPDA1                                                             | 5q31.3   | 1000         | 87    | 0.15200  | rs164502                                                              | 0.01700  | G      | 0.052  | 0.022 | 0.34%          |
| 38 | UNC84A                                                             | 7p22.3   | 1000         | 76    | 0.15300  | rs4275123                                                             | 0.00460  | A      | -0.072 | 0.025 | 0.47%          |
| 39 | MTF1                                                               | 1p34.3   | 1000         | 28    | 0.15700  | rs473279                                                              | 0.03200  | C      | -0.047 | 0.022 | 0.25%          |
| 40 | GGPS1                                                              | 1q42.3   | 1000         | 64    | 0.15900  | rs6666434                                                             | 0.01800  | C      | 0.068  | 0.029 | 0.32%          |
| 41 | TIA1                                                               | 2p13.3   | 1000         | 62    | 0.15900  | rs7575953                                                             | 0.04200  | C      | 0.042  | 0.021 | 0.23%          |
| 42 | SLC6A6                                                             | 3p25.1   | 1000         | 214   | 0.17100  | rs12632161                                                            | 0.01700  | C      | 0.119  | 0.050 | 0.33%          |
| 43 | GABARA2                                                            | 16q23.1  | 1000         | 74    | 0.17300  | rs16940467                                                            | 0.02200  | C      | -0.096 | 0.042 | 0.29%          |
| 44 | SFXN1                                                              | 5q35.2   | 1000         | 191   | 0.17600  | rs10037961                                                            | 0.00880  | A      | 0.073  | 0.028 | 0.39%          |
| 45 | MTA3                                                               | 2p21     | 1000         | 173   | 0.17900  | rs13424316                                                            | 0.01800  | C      | 0.050  | 0.021 | 0.33%          |
| 46 | CCT5                                                               | 5p15.2   | 1000         | 184   | 0.18000  | rs1045369                                                             | 0.00250  | G      | 0.086  | 0.028 | 0.51%          |
| 47 | T                                                                  | 6q27     | 1000         | 194   | 0.18000  | rs9295321                                                             | 0.00840  | A      | -0.059 | 0.022 | 0.40%          |
| 48 | NFKB2                                                              | 10q24.32 | 1000         | 28    | 0.18300  | rs7086205                                                             | 0.02000  | T      | 0.066  | 0.028 | 0.32%          |
| 49 | STRN3                                                              | 14q12    | 1000         | 164   | 0.18400  | rs2073204                                                             | 0.00590  | T      | 0.089  | 0.032 | 0.42%          |
| 50 | HMGCS1                                                             | 5p12     | 1000         | 84    | 0.18600  | rs17244293                                                            | 0.04600  | G      | -0.105 | 0.053 | 0.23%          |

Shaded SNPs are also among the 50 best genes for crypts, as computed by VEGAS

**Table S11. The 50 genes in the Krasanova gene set most strongly associated with furrows: VEGAS results for the discovery sample GWAS, N=2121**

| #  | Gene     | Test statistics for the genes most strongly associated with Furrows |              |       |         | Test Statistics for the SNP most strongly associated within each gene |         |        |        |       |                |
|----|----------|---------------------------------------------------------------------|--------------|-------|---------|-----------------------------------------------------------------------|---------|--------|--------|-------|----------------|
|    |          | Position                                                            | #Simulations | #SNPs | P-value | SNP                                                                   | P-value | Allele | beta   | SE    | r <sup>2</sup> |
| 1  | COL6A1   | 21q22.3                                                             | 1.00e+06     | 94    | 0.00212 | rs13047753                                                            | 0.00001 | G      | 0.164  | 0.036 | 1.27%          |
| 2  | MTHFD2   | 2p13.                                                               | 1.00e+06     | 65    | 0.00284 | rs1667601                                                             | 0.00023 | G      | 0.090  | 0.025 | 0.79%          |
| 3  | SEMA3A   | 7q21.11                                                             | 1.00e+06     | 379   | 0.00465 | rs10235789                                                            | 0.00009 | C      | -0.095 | 0.024 | 0.86%          |
| 4  | SENP6    | 6q14.1                                                              | 1.00e+06     | 155   | 0.00818 | rs17414086                                                            | 0.00750 | C      | -0.067 | 0.025 | 0.42%          |
| 5  | DNAJC7   | 17q21.2                                                             | 1.00e+06     | 40    | 0.00845 | rs11652600                                                            | 0.00440 | T      | 0.096  | 0.034 | 0.49%          |
| 6  | ERO1L    | 14q22.1                                                             | 1.00e+06     | 85    | 0.01736 | rs17681013                                                            | 0.00270 | A      | -0.072 | 0.024 | 0.51%          |
| 7  | PPP2CB   | 8p12                                                                | 1,00E+05     | 74    | 0.01786 | rs1116003                                                             | 0.00760 | G      | -0.091 | 0.034 | 0.39%          |
| 8  | MTF1     | 1p34.3                                                              | 1.00e+06     | 28    | 0.02026 | rs3795494                                                             | 0.00250 | A      | 0.072  | 0.024 | 0.51%          |
| 9  | TRIM27   | 6p22.1                                                              | 1.00e+06     | 112   | 0.02688 | rs16894407                                                            | 0.00600 | G      | -0.184 | 0.067 | 0.43%          |
| 10 | GRB10    | 7p12.1                                                              | 1.00e+06     | 406   | 0.03018 | rs2237481                                                             | 0.00420 | C      | -0.100 | 0.035 | 0.46%          |
| 11 | CDC42    | 1p36.12                                                             | 1.00e+06     | 106   | 0.03652 | rs760922                                                              | 0.00250 | C      | 0.140  | 0.046 | 0.49%          |
| 12 | RPL8     | 8q24.3                                                              | 1.00e+06     | 68    | 0.03848 | rs1618523                                                             | 0.01500 | C      | 0.062  | 0.026 | 0.35%          |
| 13 | TRDR1    | 10q25.3                                                             | 1.00e+06     | 119   | 0.04856 | rs682836                                                              | 0.00019 | A      | -0.093 | 0.025 | 0.85%          |
| 14 | SAR1A    | 10q22.1                                                             | 1,00E+05     | 117   | 0.05357 | rs10823490                                                            | 0.00160 | T      | -0.078 | 0.025 | 0.57%          |
| 15 | BZW2     | 7p21.1                                                              | 1.00e+06     | 199   | 0.05572 | rs1608698                                                             | 0.00490 | C      | 0.069  | 0.025 | 0.46%          |
| 16 | ITPR1    | 3p26.1                                                              | 1.00e+06     | 611   | 0.05709 | rs6766684                                                             | 0.00003 | G      | 0.104  | 0.025 | 1.00%          |
| 17 | HEYL     | 1p34.3                                                              | 1.00e+06     | 80    | 0.05934 | rs12021965                                                            | 0.00240 | C      | -0.234 | 0.077 | 0.64%          |
| 18 | CALM1    | 14q32.11                                                            | 1.00e+06     | 86    | 0.06171 | rs12147703                                                            | 0.00860 | A      | -0.103 | 0.039 | 0.41%          |
| 19 | MTPN     | 7q33                                                                | 1.00e+06     | 122   | 0.06674 | rs10244931                                                            | 0.01180 | A      | 0.063  | 0.025 | 0.37%          |
| 20 | LRP10    | 14q11.2                                                             | 1.00e+06     | 68    | 0.06964 | rs4982695                                                             | 0.00063 | T      | 0.089  | 0.026 | 0.68%          |
| 21 | SLC27A4  | 9q34.11                                                             | 1.00e+06     | 33    | 0.07153 | rs6478827                                                             | 0.02400 | C      | 0.134  | 0.059 | 0.31%          |
| 22 | ATP6V1G1 | 9q32                                                                | 1,00E+05     | 118   | 0.07939 | rs2418315                                                             | 0.00490 | A      | 0.097  | 0.035 | 0.49%          |
| 23 | PPP2R2A  | 8p21.2                                                              | 1.00e+06     | 130   | 0.07959 | rs3808582                                                             | 0.00036 | C      | -0.227 | 0.064 | 0.77%          |
| 24 | T        | 6q27                                                                | 1.00e+06     | 194   | 0.08337 | rs9457140                                                             | 0.00190 | T      | 0.093  | 0.030 | 0.58%          |
| 25 | TAF12    | 1p35.3                                                              | 1.00e+06     | 30    | 0.10044 | rs12139243                                                            | 0.04300 | T      | 0.053  | 0.026 | 0.23%          |
| 26 | DNAJB1   | 19p13.12                                                            | 1.00e+06     | 49    | 0.10164 | rs3815715                                                             | 0.00160 | C      | -0.091 | 0.029 | 0.62%          |
| 27 | PPAP2B   | 1p32.2                                                              | 1.00e+06     | 202   | 0.10199 | rs6691109                                                             | 0.00740 | C      | -0.107 | 0.040 | 0.41%          |
| 28 | METAP2   | 12q22                                                               | 1000         | 118   | 0.10400 | rs12823525                                                            | 0.01180 | G      | 0.063  | 0.025 | 0.39%          |
| 29 | PTP4A1   | 6q12                                                                | 1000         | 41    | 0.10800 | rs1197892                                                             | 0.04100 | A      | 0.093  | 0.046 | 0.23%          |
| 30 | LYAR     | 4p16.3                                                              | 1000         | 112   | 0.10900 | rs10033534                                                            | 0.01800 | A      | 0.064  | 0.027 | 0.32%          |
| 31 | SMC3     | 10q25.2                                                             | 1000         | 122   | 0.10900 | rs11815960                                                            | 0.00062 | A      | -0.201 | 0.059 | 0.65%          |
| 32 | ITM2C    | 2q37.1                                                              | 1000         | 74    | 0.11400 | rs6759606                                                             | 0.00370 | A      | 0.086  | 0.030 | 0.49%          |
| 33 | RNF11    | 1p32.3                                                              | 1000         | 34    | 0.11600 | rs11205826                                                            | 0.03200 | G      | -0.111 | 0.052 | 0.27%          |
| 34 | BZRAP1   | 17q22                                                               | 1000         | 95    | 0.11700 | rs2680688                                                             | 0.00500 | C      | -0.069 | 0.024 | 0.45%          |
| 35 | TKT      | 3p21.1                                                              | 1000         | 109   | 0.12300 | rs12635973                                                            | 0.00250 | C      | -0.147 | 0.048 | 0.51%          |
| 36 | NDRG2    | 14q11.2                                                             | 1000         | 114   | 0.12600 | rs10162349                                                            | 0.00350 | C      | -0.086 | 0.030 | 0.50%          |
| 37 | TRPM7    | 15q21.2                                                             | 1000         | 164   | 0.12700 | rs3098198                                                             | 0.01700 | A      | -0.058 | 0.024 | 0.33%          |
| 38 | PSMG2    | 18p11.21                                                            | 1000         | 77    | 0.13800 | rs2155734                                                             | 0.01300 | G      | -0.083 | 0.033 | 0.33%          |
| 39 | INCENP   | 11q12.3                                                             | 1000         | 126   | 0.14000 | rs1792949                                                             | 0.01900 | G      | 0.062  | 0.026 | 0.33%          |
| 40 | TFB2M    | 1q44                                                                | 1000         | 87    | 0.14500 | rs7517207                                                             | 0.00038 | A      | -0.117 | 0.033 | 0.76%          |
| 41 | YIF1A    | 11q13.2                                                             | 1000         | 33    | 0.14600 | rs1151540                                                             | 0.04500 | A      | -0.049 | 0.024 | 0.23%          |
| 42 | ME1      | 6q14.2                                                              | 1000         | 234   | 0.14700 | rs7757427                                                             | 0.04200 | T      | 0.053  | 0.026 | 0.24%          |
| 43 | ADAMTS10 | 19p13.2                                                             | 1000         | 32    | 0.17600 | rs3111576                                                             | 0.01800 | C      | 0.089  | 0.038 | 0.32%          |
| 44 | GNPDA1   | 5q31.3                                                              | 1000         | 87    | 0.18300 | rs2232196                                                             | 0.00670 | G      | -0.087 | 0.032 | 0.44%          |
| 45 | AGPAT4   | 6q26                                                                | 1000         | 266   | 0.18600 | rs940520                                                              | 0.00440 | T      | -0.137 | 0.048 | 0.49%          |
| 46 | AP1M2    | 19p13.2                                                             | 1000         | 48    | 0.18900 | rs1465701                                                             | 0.03700 | C      | 0.059  | 0.029 | 0.25%          |
| 47 | RPL37A   | 2q35                                                                | 1000         | 97    | 0.19000 | rs10932662                                                            | 0.00470 | T      | -0.070 | 0.025 | 0.46%          |
| 48 | GSTM4    | 1p13.3                                                              | 1000         | 60    | 0.19500 | rs1799875                                                             | 0.01240 | C      | 0.061  | 0.025 | 0.37%          |
| 49 | VCL      | 10q22.2                                                             | 1000         | 122   | 0.20000 | rs11813221                                                            | 0.03399 | G      | 0.180  | 0.085 | 0.26%          |
| 50 | TUBD1    | 17q23.1                                                             | 1000         | 43    | 0.20700 | rs8071475                                                             | 0.04000 | T      | -0.058 | 0.028 | 0.25%          |

Shaded SNPs are also among the 50 best genes for furrow, as computed by VEGAS

**Table S12. The 50 genes in the Krasanova gene set most strongly associated with pigmented ring: VEGAS results for the discovery sample GWAS, N=2121**

| #  | Gene     | Position | Test statistics for the genes most strongly associated with Pigmented Ring |       |          | Test Statistics for the SNP most strongly associated within each gene |         |        |        |       |                |
|----|----------|----------|----------------------------------------------------------------------------|-------|----------|-----------------------------------------------------------------------|---------|--------|--------|-------|----------------|
|    |          |          | #Simulations                                                               | #SNPs | P-value  | SNP                                                                   | P-value | Allele | beta   | SE    | r <sup>2</sup> |
| 1  | COL6A1   | 21q22.3  | 1.00e+06                                                                   | 94    | 0.001214 | rs13046217                                                            | 0.00009 | T      | 0.088  | 0.023 | 0.89%          |
| 2  | COX6C    | 8q22.2   | 1.00e+05                                                                   | 46    | 0.00593  | rs4434590                                                             | 0.00101 | C      | -0.098 | 0.030 | 0.65%          |
| 3  | E2F4     | 16q22.1  | 1.00e+05                                                                   | 31    | 0.01243  | rs12051249                                                            | 0.00480 | A      | -0.126 | 0.045 | 0.46%          |
| 4  | NCOR1    | 17p11.2  | 1.00e+05                                                                   | 111   | 0.01653  | rs178830                                                              | 0.00300 | T      | -0.067 | 0.023 | 0.53%          |
| 5  | AP1M2    | 19p13.2  | 1.00e+05                                                                   | 48    | 0.01789  | rs17677316                                                            | 0.00800 | G      | -0.069 | 0.026 | 0.42%          |
| 6  | TRIM6    | 11p15.4  | 1.00e+05                                                                   | 282   | 0.02169  | rs11038295                                                            | 0.00380 | G      | 0.110  | 0.038 | 0.51%          |
| 7  | TUBD1    | 17q23.1  | 1.00e+05                                                                   | 43    | 0.02456  | rs1295927                                                             | 0.00640 | A      | -0.061 | 0.023 | 0.44%          |
| 8  | GMFB     | 14q22.2  | 1.00e+05                                                                   | 44    | 0.03030  | rs4901518                                                             | 0.00111 | T      | 0.106  | 0.033 | 0.60%          |
| 9  | CD81     | 11p15.5  | 1.00e+05                                                                   | 54    | 0.03496  | rs800345                                                              | 0.01600 | C      | 0.127  | 0.052 | 0.37%          |
| 10 | CDC42    | 1p36.12  | 1.00e+05                                                                   | 106   | 0.03669  | rs7526484                                                             | 0.00061 | C      | -0.091 | 0.026 | 0.70%          |
| 11 | PON3     | 7q21.3   | 1.00e+05                                                                   | 118   | 0.04334  | rs10487133                                                            | 0.00003 | T      | -0.141 | 0.034 | 1.02%          |
| 12 | RPL8     | 8q24.3   | 1.00e+05                                                                   | 68    | 0.04568  | rs2955195                                                             | 0.02600 | T      | 0.051  | 0.023 | 0.30%          |
| 13 | ADAMTS10 | 19p13.2  | 1.00e+05                                                                   | 32    | 0.05013  | rs2967715                                                             | 0.00380 | T      | 0.151  | 0.052 | 0.52%          |
| 14 | TFB2M    | 1q44     | 1.00e+05                                                                   | 87    | 0.05115  | rs3120693                                                             | 0.01270 | A      | 0.170  | 0.068 | 0.38%          |
| 15 | RABL3    | 3q13.33  | 1.00e+05                                                                   | 52    | 0.05238  | rs2292719                                                             | 0.01800 | G      | -0.059 | 0.025 | 0.32%          |
| 16 | ALOX12   | 17p13.1  | 1.00e+05                                                                   | 60    | 0.05416  | rs188774                                                              | 0.01700 | G      | -0.068 | 0.029 | 0.33%          |
| 17 | BCAP29   | 7q22.3   | 1.00e+05                                                                   | 74    | 0.06144  | rs11761775                                                            | 0.00500 | A      | -0.063 | 0.022 | 0.45%          |
| 18 | PREB     | 2p23.3   | 1.00e+05                                                                   | 43    | 0.06777  | rs4665955                                                             | 0.00080 | C      | -0.076 | 0.023 | 0.65%          |
| 19 | TIA1     | 2p13.3   | 1.00E+05                                                                   | 62    | 0.08327  | rs12713689                                                            | 0.02700 | A      | 0.050  | 0.022 | 0.28%          |
| 20 | KCNH1    | 1q32.2   | 1.00e+05                                                                   | 516   | 0.08465  | rs6540636                                                             | 0.00090 | G      | 0.116  | 0.035 | 0.63%          |
| 21 | SARS     | 1p13.3   | 1.00E+05                                                                   | 118   | 0.08926  | rs12239854                                                            | 0.00350 | A      | 0.090  | 0.031 | 0.51%          |
| 22 | CCNL1    | 3q25.31  | 1000                                                                       | 69    | 0.10500  | rs6441111                                                             | 0.01090 | C      | 0.055  | 0.022 | 0.36%          |
| 23 | SAR1A    | 10q22.1  | 1000                                                                       | 117   | 0.10700  | rs12262702                                                            | 0.00620 | C      | -0.121 | 0.044 | 0.48%          |
| 24 | SLC3A2   | 11q12.3  | 1000                                                                       | 68    | 0.10900  | rs474209                                                              | 0.03600 | C      | -0.049 | 0.024 | 0.26%          |
| 25 | SETDB1   | 1q21.3   | 1000                                                                       | 56    | 0.11300  | rs267734                                                              | 0.01600 | T      | -0.065 | 0.027 | 0.34%          |
| 26 | ATP6V1G1 | 9q32     | 1000                                                                       | 118   | 0.11500  | rs10114562                                                            | 0.00950 | C      | 0.058  | 0.023 | 0.40%          |
| 27 | MCM5     | 22q12.3  | 1000                                                                       | 91    | 0.11600  | rs133420                                                              | 0.00360 | C      | 0.117  | 0.040 | 0.48%          |
| 28 | STRN3    | 14q12    | 1000                                                                       | 164   | 0.11800  | rs179658                                                              | 0.00117 | T      | 0.079  | 0.024 | 0.63%          |
| 29 | PPP1CC   | 12q24.11 | 1000                                                                       | 50    | 0.11900  | rs16940992                                                            | 0.02800 | A      | -0.071 | 0.032 | 0.28%          |
| 30 | PSMG2    | 18p11.21 | 1000                                                                       | 77    | 0.12400  | rs888270                                                              | 0.00380 | G      | 0.087  | 0.030 | 0.51%          |
| 31 | COL5A1   | 9q34.3   | 1000                                                                       | 276   | 0.12700  | rs13301426                                                            | 0.00095 | C      | 0.134  | 0.041 | 0.62%          |
| 32 | PPP2CB   | 8p12     | 1000                                                                       | 74    | 0.15600  | rs12543324                                                            | 0.04300 | C      | 0.069  | 0.034 | 0.25%          |
| 33 | GNPDA1   | 5q31.3   | 1000                                                                       | 87    | 0.16000  | rs163918                                                              | 0.06400 | C      | -0.072 | 0.039 | 0.20%          |
| 34 | ERCC2    | 19q13.32 | 1000                                                                       | 65    | 0.17000  | rs1799787                                                             | 0.02200 | G      | 0.055  | 0.024 | 0.31%          |
| 35 | FBXO32   | 8q24.13  | 1000                                                                       | 133   | 0.17700  | rs16898505                                                            | 0.00054 | A      | -0.165 | 0.048 | 0.65%          |
| 36 | GGPS1    | 1q42.3   | 1000                                                                       | 64    | 0.18700  | rs4659821                                                             | 0.00064 | T      | 0.178  | 0.052 | 0.69%          |
| 37 | EMILIN3  | 20q12    | 1000                                                                       | 75    | 0.19600  | rs6102363                                                             | 0.03000 | A      | 0.138  | 0.064 | 0.29%          |
| 38 | DDX5     | 17q23.3  | 1000                                                                       | 6     | 0.20100  | rs7212377                                                             | 0.07400 | T      | 0.089  | 0.050 | 0.20%          |
| 39 | ELAVL2   | 9p21.3   | 1000                                                                       | 295   | 0.20300  | rs10966006                                                            | 0.00170 | G      | 0.134  | 0.043 | 0.57%          |
| 40 | COX8A    | 11q13.1  | 1000                                                                       | 48    | 0.20800  | rs578001                                                              | 0.03000 | G      | 0.048  | 0.022 | 0.27%          |
| 41 | CHST11   | 12q23.3  | 1000                                                                       | 513   | 0.20800  | rs3924373                                                             | 0.00004 | G      | 0.145  | 0.035 | 1.02%          |
| 42 | POLE2    | 14q21.3  | 1000                                                                       | 64    | 0.21000  | rs12890086                                                            | 0.06500 | G      | -0.045 | 0.024 | 0.20%          |
| 43 | PPAP2B   | 1p32.2   | 1000                                                                       | 202   | 0.21300  | rs11206816                                                            | 0.01120 | A      | 0.064  | 0.025 | 0.37%          |
| 44 | RRAS2    | 11p15.2  | 1000                                                                       | 98    | 0.21400  | rs10766178                                                            | 0.01500 | A      | 0.063  | 0.026 | 0.33%          |
| 45 | ATP2A2   | 12q24.11 | 1000                                                                       | 29    | 0.21800  | rs11065630                                                            | 0.03700 | A      | 0.164  | 0.079 | 0.22%          |
| 46 | PABPC1   | 8q22.3   | 1000                                                                       | 109   | 0.21900  | rs2935548                                                             | 0.00320 | A      | -0.104 | 0.035 | 0.48%          |
| 47 | LOXL3    | 2p13.1   | 1000                                                                       | 32    | 0.22000  | rs10454145                                                            | 0.08500 | C      | -0.061 | 0.035 | 0.17%          |
| 48 | HOMER3   | 19p13.11 | 1000                                                                       | 37    | 0.22400  | rs4808167                                                             | 0.03200 | A      | -0.052 | 0.024 | 0.30%          |
| 49 | SLC30A3  | 2p23.3   | 1000                                                                       | 62    | 0.23000  | rs13404327                                                            | 0.11000 | G      | -0.041 | 0.026 | 0.15%          |
| 50 | SENP6    | 6q14.1   | 1000                                                                       | 155   | 0.23100  | rs13205073                                                            | 0.01290 | T      | -0.076 | 0.031 | 0.34%          |

Shaded SNPs are also among the 50 best genes for the pigmented ring, as computed by VEGAS

**Table S13. The 50 genes in the Krasanova gene set most strongly associated with iris nevi: VEGAS results for the discovery sample GWAS, N=2121**

| #  | Gene     | Position | Test statistics for the genes most strongly associated with Nevi |       |         | Test Statistics for the SNP most strongly associated within each gene |         |        |        |       |                |
|----|----------|----------|------------------------------------------------------------------|-------|---------|-----------------------------------------------------------------------|---------|--------|--------|-------|----------------|
|    |          |          | #Simulations                                                     | #SNPs | P-value | SNP                                                                   | P-value | Allele | beta   | SE    | h <sup>2</sup> |
| 1  | YIF1A    | 11q13.2  | 1,00E+05                                                         | 33    | 0.00209 | rs479018                                                              | 0.00210 | G      | 0.050  | 0.016 | 0.53%          |
| 2  | METAP2   | 12q22    | 1.00e+05                                                         | 118   | 0.00409 | rs2197973                                                             | 0.00053 | T      | -0.054 | 0.016 | 0.69%          |
| 3  | COX8A    | 11q13.1  | 1.00e+05                                                         | 48    | 0.00544 | rs4980499                                                             | 0.00270 | G      | 0.047  | 0.016 | 0.50%          |
| 4  | RPS6     | 9p22.1   | 1.00e+05                                                         | 75    | 0.00578 | rs10757054                                                            | 0.00078 | G      | 0.074  | 0.022 | 0.60%          |
| 5  | CCT6A    | 7p11.2   | 1.00e+05                                                         | 40    | 0.008   | rs10043                                                               | 0.00240 | C      | 0.058  | 0.019 | 0.53%          |
| 6  | ELOVL6   | 4q25     | 1.00e+05                                                         | 219   | 0.01364 | rs6533491                                                             | 0.00044 | C      | -0.054 | 0.015 | 0.68%          |
| 7  | PON3     | 7q21.3   | 1.00e+05                                                         | 118   | 0.0142  | rs13223537                                                            | 0.00180 | T      | 0.056  | 0.018 | 0.57%          |
| 8  | TRIM6    | 11p15.4  | 1.00e+05                                                         | 282   | 0.02632 | rs7120668                                                             | 0.00250 | G      | -0.049 | 0.016 | 0.53%          |
| 9  | RPL37A   | 2q35     | 1.00e+05                                                         | 97    | 0.03118 | rs922987                                                              | 0.00024 | T      | 0.057  | 0.015 | 0.76%          |
| 10 | ALDH9A1  | 1q24.1   | 1.00e+05                                                         | 176   | 0.03136 | rs9919190                                                             | 0.00730 | C      | 0.046  | 0.017 | 0.41%          |
| 11 | LRP10    | 14q11.2  | 1.00e+05                                                         | 68    | 0.03346 | rs8006914                                                             | 0.01500 | C      | 0.041  | 0.017 | 0.35%          |
| 12 | RHOD     | 11q13.2  | 1.00e+05                                                         | 29    | 0.03808 | rs7112925                                                             | 0.02000 | C      | 0.038  | 0.016 | 0.32%          |
| 13 | HMGCS1   | 5p12     | 1,00E+05                                                         | 84    | 0.04219 | rs7380703                                                             | 0.01800 | T      | -0.043 | 0.018 | 0.32%          |
| 14 | COP55    | 8q13.1   | 1.00e+05                                                         | 3     | 0.04629 | rs11785782                                                            | 0.04500 | C      | -0.032 | 0.016 | 0.22%          |
| 15 | GMFB     | 14q22.2  | 1.00e+05                                                         | 44    | 0.05875 | rs10162293                                                            | 0.01500 | A      | -0.048 | 0.020 | 0.33%          |
| 16 | GSTM4    | 1p13.3   | 1.00e+05                                                         | 60    | 0.05978 | rs12131828                                                            | 0.00750 | G      | -0.146 | 0.054 | 0.46%          |
| 17 | AGPAT4   | 6q26     | 1.00e+05                                                         | 266   | 0.06367 | rs1111040                                                             | 0.00450 | T      | 0.046  | 0.016 | 0.44%          |
| 18 | DNAJC7   | 17q21.2  | 1.00e+05                                                         | 40    | 0.06839 | rs8079958                                                             | 0.02400 | G      | -0.060 | 0.026 | 0.30%          |
| 19 | SENP6    | 6q14.1   | 1.00e+05                                                         | 155   | 0.07744 | rs9447522                                                             | 0.01260 | A      | 0.039  | 0.016 | 0.34%          |
| 20 | PSAT1    | 9q21.2   | 1.00e+05                                                         | 166   | 0.07765 | rs11137607                                                            | 0.01600 | A      | 0.038  | 0.016 | 0.34%          |
| 21 | DDT      | 22q11.23 | 1.00e+05                                                         | 31    | 0.07902 | rs7291786                                                             | 0.00460 | C      | 0.064  | 0.023 | 0.47%          |
| 22 | DC7      | 1p22.1   | 1,00E+05                                                         | 140   | 0.08497 | rs936340                                                              | 0.00230 | T      | -0.048 | 0.016 | 0.54%          |
| 23 | YWHAB    | 20q13.12 | 1.00e+05                                                         | 92    | 0.0863  | rs1079900                                                             | 0.01900 | A      | 0.038  | 0.016 | 0.32%          |
| 24 | TRPM7    | 15q21.2  | 1.00e+05                                                         | 164   | 0.0889  | rs8042172                                                             | 0.00840 | T      | -0.050 | 0.019 | 0.39%          |
| 25 | AP1M2    | 19p13.2  | 1.00e+05                                                         | 48    | 0.09038 | rs3745249                                                             | 0.01700 | C      | -0.038 | 0.016 | 0.33%          |
| 26 | ITM2C    | 2q37.1   | 1.00e+05                                                         | 74    | 0.09093 | rs6724157                                                             | 0.00170 | C      | 0.060  | 0.019 | 0.54%          |
| 27 | NDUFA8   | 9q33.2   | 1.00e+05                                                         | 125   | 0.09886 | rs7030059                                                             | 0.00770 | T      | 0.058  | 0.022 | 0.41%          |
| 28 | CDC42    | 1p36.12  | 1.00e+05                                                         | 106   | 0.09992 | rs3820285                                                             | 0.00073 | G      | -0.171 | 0.051 | 0.56%          |
| 29 | ATP5B    | 12q13.3  | 1000                                                             | 36    | 0.105   | rs17444799                                                            | 0.04000 | C      | 0.063  | 0.031 | 0.22%          |
| 30 | CFDP1    | 16q23.1  | 1,00E+05                                                         | 152   | 0.10618 | rs4887828                                                             | 0.00910 | A      | 0.049  | 0.019 | 0.36%          |
| 31 | RBPMS    | 8p12     | 1000                                                             | 193   | 0.107   | rs6985051                                                             | 0.00260 | G      | 0.055  | 0.018 | 0.51%          |
| 32 | PABPC1   | 8q22.3   | 1.00e+05                                                         | 109   | 0.10934 | rs1039153                                                             | 0.02400 | T      | -0.037 | 0.016 | 0.28%          |
| 33 | EMILIN3  | 20q12    | 1000                                                             | 75    | 0.114   | rs6029636                                                             | 0.01240 | C      | 0.044  | 0.017 | 0.36%          |
| 34 | MCM5     | 22q12.3  | 1000                                                             | 91    | 0.115   | rs2071737                                                             | 0.01120 | G      | 0.040  | 0.016 | 0.36%          |
| 35 | GGPS1    | 1q42.3   | 1000                                                             | 64    | 0.118   | rs6666434                                                             | 0.01800 | C      | 0.050  | 0.021 | 0.32%          |
| 36 | CD81     | 11p15.5  | 1000                                                             | 54    | 0.118   | rs808964                                                              | 0.03500 | A      | 0.038  | 0.018 | 0.25%          |
| 37 | REV3L    | 6q21     | 1000                                                             | 211   | 0.12    | rs3851228                                                             | 0.00067 | A      | 0.110  | 0.032 | 0.65%          |
| 38 | PMM1     | 22q13.2  | 1000                                                             | 39    | 0.121   | rs5996039                                                             | 0.07500 | A      | 0.036  | 0.020 | 0.19%          |
| 39 | ATP6V1C1 | 8q22.3   | 1000                                                             | 207   | 0.122   | rs2515173                                                             | 0.00057 | T      | 0.053  | 0.015 | 0.65%          |
| 40 | ALOX12   | 17p13.1  | 1000                                                             | 60    | 0.123   | rs11078663                                                            | 0.00160 | T      | -0.052 | 0.016 | 0.59%          |
| 41 | CEBPZ    | 2p22.2   | 1000                                                             | 108   | 0.128   | rs11124570                                                            | 0.00590 | A      | 0.081  | 0.029 | 0.42%          |
| 42 | LCOR     | 10q24.1  | 1000                                                             | 80    | 0.132   | rs11188929                                                            | 0.06200 | G      | 0.050  | 0.027 | 0.21%          |
| 43 | SMC3     | 10q25.2  | 1000                                                             | 122   | 0.135   | rs11591748                                                            | 0.01050 | G      | 0.068  | 0.026 | 0.39%          |
| 44 | WISP1    | 8q24.22  | 1000                                                             | 206   | 0.136   | rs2929984                                                             | 0.01290 | G      | 0.049  | 0.020 | 0.37%          |
| 45 | ANK3     | 10q21.2  | 1000                                                             | 547   | 0.136   | rs10761482                                                            | 0.00690 | C      | 0.051  | 0.019 | 0.42%          |
| 46 | USP3     | 15q22.31 | 1000                                                             | 127   | 0.136   | rs11630290                                                            | 0.00001 | C      | 0.094  | 0.021 | 1.13%          |
| 47 | SLC16A3  | 17q25.3  | 1000                                                             | 44    | 0.137   | rs4789670                                                             | 0.06300 | T      | -0.029 | 0.016 | 0.19%          |
| 48 | TUBB4    | 19p13.3  | 1000                                                             | 32    | 0.137   | rs3760749                                                             | 0.00530 | A      | -0.071 | 0.025 | 0.44%          |
| 49 | TRIM27   | 6p22.1   | 1000                                                             | 112   | 0.151   | rs9257319                                                             | 0.01020 | T      | 0.054  | 0.021 | 0.35%          |
| 50 | ADM      | 11p15.4  | 1000                                                             | 93    | 0.152   | rs1442739                                                             | 0.01900 | C      | 0.045  | 0.019 | 0.29%          |

Shaded SNPs are also among the 50 best genes for iris nevi, as computed by VEGAS

**Table S14. Results of the bootstrap analyses examining evidence for signal enhancement in SNPs located within the genes identified as influencing neural patterns by Krasanova<sup>60</sup>.** Using sampling with replacement we examined evidence for signal enhancement in 1000 bootstrapped sets of 219 genes of similar size, containing similar numbers of SNPs (Mean SNPs per gene; Krasanova: 113.3, sd 102.2; random sets 123.8, sd 10.15). For crypts we found 542 of the 24812 SNPs from the Krasanova set attained  $p \leq .01$ , whereas only 19 sets of the 1000 randomly sampled gene sets yielded 542 or more SNPs  $P \leq .01$ ; yielding an empirical p-value of .019. Likewise, we found 399 of the 24812 SNPs from the Krasanova set attained  $p \leq .01$ , whereas only 34 sets of the 1000 randomly sampled gene sets yielded 399 or more SNPs  $P \leq .01$ ; yielding an empirical p-value of .034 for furrows. The empirical p-values for the two pigmentation characteristics, Pigment Ring and Iris Nevi, act as negative controls in these analyses, yielding no evidence of signal enhancement.

| Iris Characteristic | N SNPs $p < .01$ from Krasanova's gene set | N random gene sets yielding the an equal or greater number of SNPs $p < .01$ as observed in Krasanova's gene set <sup>a</sup> | Empirical Probability |
|---------------------|--------------------------------------------|-------------------------------------------------------------------------------------------------------------------------------|-----------------------|
| Crypt               | 542                                        | 19                                                                                                                            | 19/1001 = 0.019       |
| Furrow              | 399                                        | 34                                                                                                                            | 34/1001 = 0.034       |
| Pigment Ring        | 289                                        | 339                                                                                                                           | 339/1001 = 0.339      |
| Iris Nevi           | 375                                        | 91                                                                                                                            | 91/1001 = 0.091       |

**Table S15. Correlations between iris characteristics and allelic profile scores**

- (i) the 50 most significant genes derived from the VEGAS analyses of the discovery sample (Tables S5-8);  
(ii) the 50 most significant genes from the VEGAS analyses of the discovery sample that appear in the Krasanova gene set (Tables S10-13);  
(iii) the union of (i) and (ii); and finally,  
(iv) to examine the possibility that these effects were being driven by major gene effects, the three most significant genes from (ii).

In calculating the profile scores, we selected the SNP that showed the strongest association signal for each gene in the GWAS analyses of the discovery sample and weighting the number of risk alleles at each locus by the allelic effect (beta) from discovery sample. To examine the extent to which these scores could explain variation across phenotypes within the discovery sample and predict variation in the replication sample we compared the profile scores to the iris characteristics in unrelated individuals in the discovery sample and replication sample 2. The within sample and across sample correlations are given below.

| Allelic profile scores    | Number of SNPs in each gene set |       | Iris ratings for Crypts |       | Iris ratings for Furrows |       | Iris ratings for Pigmented Ring |       | Iris ratings for Nevi |       |
|---------------------------|---------------------------------|-------|-------------------------|-------|--------------------------|-------|---------------------------------|-------|-----------------------|-------|
|                           | GWAS                            | Rep 2 | GWAS                    | Rep 2 | GWAS                     | Rep 2 | GWAS                            | Rep 2 | GWAS                  | Rep 2 |
| <i>i</i> Crypts           | 50                              | 50    | .41**                   | .13   | -.11**                   | -.14  | -.07*                           | -.23  | .03                   | -.03  |
| <i>ii</i> Crypts          | 50                              | 50    | .41**                   | .20   | -.04                     | .07   | .01                             | -.06  | .06                   | .06   |
| <i>iii</i> Crypt          | 95                              | 95    | .50**                   | .18   | -.10**                   | -.05  | -.05                            | -.18  | .04                   | .01   |
| <i>iv</i> Crypts          | 3                               | 3     | .14**                   | .23   | -.05                     | -.26  | .03                             | -.23  | .06                   | -.21  |
| <i>i</i> Furrow           | 50                              | 50    | -.08*                   | .07   | .33**                    | .20   | .05                             | -.08  | .01                   | .07   |
| <i>ii</i> Furrow          | 50                              | 50    | -.12**                  | -.07  | .37**                    | -.18  | .07*                            | -.07  | .01                   | -.13  |
| <i>iii</i> Furrow         | 97                              | 97    | -.11**                  | .03   | .44**                    | .07   | .07*                            | -.15  | .02                   | .00   |
| <i>iv</i> Furrow          | 3                               | 3     | -.11**                  | -.01  | .12**                    | .13   | .01                             | .09   | .02                   | -.05  |
| <i>i</i> Pigmented Ring   | 50                              | 50    | -.04                    | -.02  | .08*                     | .21   | .38**                           | .27   | .03                   | .42** |
| <i>ii</i> Pigmented Ring  | 50                              | 50    | -.03                    | .10   | .11**                    | -.37* | .28**                           | -.30  | .08*                  | -.06  |
| <i>iii</i> Pigmented Ring | 99                              | 99    | -.05                    | .03   | .12**                    | .07   | .43**                           | .12   | .06                   | .38*  |
| <i>iv</i> Pigmented Ring  | 3                               | 3     | .05                     | -.20  | .04                      | -.28  | .08*                            | -.16  | .01                   | -.03  |
| <i>i</i> Nevi             | 50                              | 50    | -.02                    | -.07  | .05                      | .06   | .08*                            | .27*  | .27**                 | .03   |
| <i>ii</i> Nevi            | 50                              | 50    | -.03                    | -.07  | .02                      | .06   | .10**                           | .00   | .33**                 | -.13  |
| <i>iii</i> Nevi           | 95                              | 95    | -.02                    | -.06  | .03                      | .06   | .09**                           | .16   | .39**                 | -.08  |
| <i>iv</i> Nevi            | 3                               | 3     | -.01                    | -.01  | -.01                     | -.17  | .01                             | -.07  | .10**                 | -.26  |

\* p < .05. \*\* p < .0
